# Supplementary material
Source: publisher figshare collection journal article supplement (https://tandf.figshare.com/articles/dataset/_/7160663)
Supplement: Supplementary file 2 [file 1]

**Third Online Supplement:**  
**Part (a) Recursions and Proof of Proposition 4.1**

Chrysoula Dimitriou-Fakalou  
Email: my.submission@mail.com

- For the part (a) recursions (of Proposition 4.1):

–  $m$ -step: Write  $RS^{\{0\}} := RS$ , ...,  $r^{r+1}q^{\{0\}} := r^{r+1}q$  and define for  $m = 1, \dots, d^*$  and  $r = 1, 2, \dots, k-1$ , that

$$RS(d)_{t,l}^{\{m\}} := \begin{cases} RS(d)_{t,l}^{\{m-1\}} + RS(d)_{t,m}^{\{m-1\}} RS(d)_{t-m,l-m}, & \text{if } l = 1+m, \dots, d^*+m-1, \\ RS(d)_{t,m}^{\{m-1\}} RS(d)_{t-m,l-m}, & \text{if } l = d^*+m \end{cases} \quad (1)$$

and

$$R^{r+1}S(d)_{t,l}^{\{m\}} := \begin{cases} R^{r+1}S(d)_{t,l}^{\{m-1\}} + R^{r+1}S(d)_{t,m}^{\{m-1\}} R^{r+1}S(d)_{t-m,l-m}, \\ \quad \text{if } l = 1+m, \dots, d^*+m-1, \\ \left[ L_{1:k+1-r,1:k-r}^{((k+1)^{q-2-d})} \left( R^{r+1}S(d)_{t,m}^{\{m-1\}} R^{r+1}S(d)_{t-m,l-m} \right) \mid OR^r S(d)_{t,l}^{\{m-1\}} + \right. \\ \left. L_{1:k+1-r,k+1-r}^{((k+1)^{q-2-d})} \left( R^{r+1}S(d)_{t,m}^{\{m-1\}} R^{r+1}S(d)_{t-m,l-m} \right) \right], & \text{if } l = d^*+m \end{cases} \quad (2)$$

and

$$OR^r S(d)_{t,l}^{\{m\}} := \begin{cases} OR^r S(d)_{t,l}^{\{m-1\}} + R^{r+1}S(d)_{t,m}^{\{m-1\}} OR^r S(d)_{t-m,l-m}, \\ \quad \text{if } l = d^*+m+1, \dots, (r+1)d^*+m-1, \\ R^{r+1}S(d)_{t,m}^{\{m-1\}} OR^r S(d)_{t-m,l-m}, \\ \quad \text{if } l = (r+1)d^*+m \end{cases} \quad (3)$$

and

$$r^{r+1}s(d)_{t,l}^{\{m\}} := \begin{cases} r^{r+1}s(d)_{t,l}^{\{m-1\}}, & \text{if } l = 1, \dots, m, \\ r^{r+1}s(d)_{t,l}^{\{m-1\}} + R^{r+1}S(d)_{t,m}^{\{m-1\}} r^{r+1}s(d)_{t-m,l-m}, \\ \quad \text{if } l = 1+m, \dots, (r+1)d^*+m-1, \\ R^{r+1}S(d)_{t,m}^{\{m-1\}} r^{r+1}s(d)_{t-m,l-m}, \\ \quad \text{if } l = (r+1)d^*+m \end{cases} \quad (4)$$

where this last one is set for  $r = 0$  as well; similarly,

$$RQ(d)_{t,l}^{\{m\}} := \begin{cases} RQ(d)_{t,l}^{\{m-1\}} + RQ(d)_{t,m}^{\{m-1\}} RS(d)_{t-m,l-m}, & \text{if } l = 1+m, \dots, d^*+m-1, \\ RQ(d)_{t,m}^{\{m-1\}} RS(d)_{t-m,l-m}, & \text{if } l = d^*+m \end{cases} \quad (5)$$

and

$$R^{r+1}Q(d)_{t,l}^{\{m\}} := \begin{cases} R^{r+1}Q(d)_{t,l}^{\{m-1\}} + R^{r+1}Q(d)_{t,m}^{\{m-1\}} R^{r+1}S(d)_{t-m,l-m}, \\ \quad \text{if } l = 1+m, \dots, d^*+m-1, \\ \left[ L_{1:k-r}^{((k+1)^{q-2-d})} \left( R^{r+1}Q(d)_{t,m}^{\{m-1\}} R^{r+1}S(d)_{t-m,l-m} \right) \mid OR^r Q(d)_{t,l}^{\{m-1\}} + \right. \\ \left. L_{k-r+1}^{((k+1)^{q-2-d})} \left( R^{r+1}Q(d)_{t,m}^{\{m-1\}} R^{r+1}S(d)_{t-m,l-m} \right) \right], & \text{if } l = d^*+m \end{cases} \quad (6)$$

and

$$OR^r Q(d)_{t,l}^{\{m\}} := \begin{cases} OR^r Q(d)_{t,l}^{\{m-1\}} + R^{r+1} Q(d)_{t,m}^{\{m-1\}} OR^r S(d)_{t-m,l-m}, & \text{if } l = d^* + m + 1, \dots, (r+1)d^* + m - 1, \\ R^{r+1} Q(d)_{t,m}^{\{m-1\}} OR^r S(d)_{t-m,l-m}, & \text{if } l = (r+1)d^* + m \end{cases} \quad (7)$$

and

$$r^{r+1} q(d)_{t,l}^{\{m\}} := \begin{cases} r^{r+1} q(d)_{t,l}^{\{m-1\}}, & \text{if } l = 1, \dots, m, \\ r^{r+1} q(d)_{t,l}^{\{m-1\}} + R^{r+1} Q(d)_{t,m}^{\{m-1\}} r^{r+1} s(d)_{t-m,l-m}, & \text{if } l = 1 + m, \dots, (r+1)d^* + m - 1, \\ R^{r+1} Q(d)_{t,m}^{\{m-1\}} r^{r+1} s(d)_{t-m,l-m}, & \text{if } l = (r+1)d^* + m \end{cases} \quad (8)$$

where this last one is also set for  $r = 0$ .

-  $r$ - step: For  $r = 1, \dots, k-1$ , define  $R^{r+1} S(d)_{t,l}$ ,  $l = 1, \dots, d^*$  to be square  $(k+1)^{q-2-d}(k+1-r)$  matrices, such that

$$L_{i,j}^{((k+1)^{q-2-d})} (R^{r+1} S(d)_{t,l}) := B^{l(k-r+1)-j} H B^{(d^*-l)(k-r+1)+j-1} R^r S(d)_{t,d^*+l}^{(i+r),\{d^*\}} \quad (9)$$

for  $i, j = 1, \dots, k+1-r$ .

Define  $OR^r S(d)_{t,l}$ ,  $l = 1 + d^*, \dots, (r+1)d^*$  to be  $[(k+1)^{q-2-d}(k+1-r)] \times (k+1)^{q-2-d}$  matrices, such that

$$L_{i,1}^{((k+1)^{q-2-d})} (OR^r S(d)_{t,l}) := \begin{cases} B^{(k-r+1)d^*} R^r S(d)_{t,l}^{(i+r, k+1),\{d^*\}}, & \text{if } l = 1 + d^*, \dots, 2d^*, \\ B^{(k-r+1)d^*} OR^{r-1} S(d)_{t,l}^{(i+r),\{d^*\}}, & \text{if } l = 2d^* + 1, \dots, (r+1)d^* \end{cases} \quad (10)$$

for  $i = 1, \dots, k+1-r$ .

Define  $r^{r+1} s(d)_{t,l}$ ,  $l = 1, \dots, (r+1)d^*$  to be the  $(k+1)^{q-2-d}(k+1-r)$  long column vectors, such that

$$L_i^{((k+1)^{q-2-d})} (r^{r+1} s(d)_{t,l}) := \begin{cases} L_{i+1}^{((k+1)^{q-2-d})} (r^r s(d)_{t,l}^{\{d^*\}}), & \text{if } l = 1 \\ b^{(k-r+1)(l-1)} r^r s(d)_{t,l}^{(i+r),\{d^*\},\{d^*-1\}}, & \text{if } l = 2, \dots, d^*, \\ b^{(k-r+1)d^*} r^r s(d)_{t,l}^{(i+r),\{d^*\}}, & \text{if } l = 1 + d^*, \dots, (r+1)d^* \end{cases} \quad (11)$$

for  $i = 1, \dots, k+1-r$ .

Similarly, define  $R^{r+1} Q(d)_{t,l}$ ,  $l = 1, \dots, d^*$  to be  $(k+1)^{q-2-d}(k+1-r)$  long row vectors, such that

$$L_j^{((k+1)^{q-2-d})} (R^{r+1} Q(d)_{t,l}) := B^{l(k-r+1)-j} H B^{(d^*-l)(k-r+1)+j-1} R^r Q(d)_{t,d^*+l}^{\{d^*\}} \quad (12)$$

for  $j = 1, \dots, k+1-r$ .

Define  $OR^r Q(d)_{t,l}$ ,  $l = 1+d^*, \dots, (r+1)d^*$  to be the  $(k+1)^{q-2-d}$  long row vectors, such that

$$OR^r Q(d)_{t,l} := \begin{cases} B^{(k-r+1)d^*} R^r Q(d)_{t,l}^{(k+1), \{d^*\}}, & \text{if } l = 1+d^*, \dots, 2d^*, \\ B^{(k-r+1)d^*} OR^{r-1} Q(d)_{t,l}^{\{d^*\}}, & \text{if } l = 2d^*+1, \dots, (r+1)d^* \end{cases}. \quad (13)$$

Define  $r^{r+1} q(d)_{t,l}$ ,  $l = 1, \dots, (r+1)d^*$  to be scalars, such that

$$r^{r+1} q(d)_{t,l} := \begin{cases} r^r q(d)_{t,l}^{\{d^*\}}, & \text{if } l = 1, \\ b^{(k-r+1)(l-1)} r^r q(d)_{t,l}^{\{d^*\}, \{d^*-1\}}, & \text{if } l = 2, \dots, d^*, \\ b^{(k-r+1)d^*} r^r q(d)_{t,l}^{\{d^*\}}, & \text{if } l = 1+d^*, \dots, (r+1)d^* \end{cases}. \quad (14)$$

– Basic step: The fixed  $d$  is often implied within this step; for  $m = 1, \dots, d^*$  (fixed  $r = 1, \dots, k$ ), define

$$H R^r S_{t,u}^{(i), \{m\}} := \{L_{i-r+1,1}^{((k+1)^{q-2-d})} (R^r S_{t,u}^{\{m\}})\} \{L_{2,1}^{((k+1)^{q-2-d})} (R^r S_{t-m,u-m})\}^{-1}, \quad (15)$$

$$H R^r Q_{t,u}^{\{m\}} := \{L_1^{((k+1)^{q-2-d})} (R^r Q_{t,u}^{\{m\}})\} \{L_{2,1}^{((k+1)^{q-2-d})} (R^r S_{t-m,u-m})\}^{-1}, \quad (16)$$

followed by

$$B R^r S_{t,l}^{(i,j), \{m\}} := L_{i-r+1,j-r+1}^{((k+1)^{q-2-d})} (R^r S_{t,l}^{\{m\}}) - H R^r S_{t,d^*+m}^{(i), \{m\}} \cdot L_{2,j-r+1}^{((k+1)^{q-2-d})} (R^r S_{t-m,l-m}), \quad (17)$$

$$B R^r Q_{t,l}^{(j), \{m\}} := L_{j-r+1}^{((k+1)^{q-2-d})} (R^r Q_{t,l}^{\{m\}}) - H R^r Q_{t,d^*+m}^{\{m\}} \cdot L_{2,j-r+1}^{((k+1)^{q-2-d})} (R^r S_{t-m,l-m}), \quad (18)$$

$$b r^r s_{t,l}^{(i), \{m\}} := L_{i-r+1}^{((k+1)^{q-2-d})} (r^r s_{t,l}^{\{m\}}) - H R^r S_{t,d^*+m}^{(i), \{m\}} \cdot L_2^{((k+1)^{q-2-d})} (r^r s_{t-m,l-m}), \quad (19)$$

$$b r^r q_{t,l}^{\{m\}} := r^r q_{t,l}^{\{m\}} - H R^r Q_{t,d^*+m}^{\{m\}} \cdot L_2^{((k+1)^{q-2-d})} (r^r s_{t-m,l-m}); \quad (20)$$

for  $r = 2, \dots, k$  only, also define

$$\begin{aligned} B O R^{r-1} S_{t,l}^{(i), \{m\}} &:= L_{i-r+1,1}^{((k+1)^{q-2-d})} (O R^{r-1} S_{t,l}^{\{m\}}) - H R^r S_{t,d^*+m}^{(i), \{m\}} \cdot \\ &\quad L_{2,1}^{((k+1)^{q-2-d})} (O R^{r-1} S_{t-m,l-m}), \\ B O R^{r-1} Q_{t,l}^{\{m\}} &:= O R^{r-1} Q_{t,l}^{\{m\}} - H R^r Q_{t,d^*+m}^{\{m\}} \cdot L_{2,1}^{((k+1)^{q-2-d})} (O R^{r-1} S_{t-m,l-m}). \end{aligned}$$

Next, for  $i_* = r+1, \dots, k$ , define

$$H B^{i_*-r} R^r S_{t,u}^{(i), \{m\}} := \{B^{i_*-r} R^r S_{t,u}^{(i,i_*), \{m\}}\} \{C^{i_*-r} R^r S_{t-m,u-m}^{(i_*+1,i_*)}\}^{-1}, \quad (21)$$

$$H B^{i_*-r} R^r Q_{t,u}^{\{m\}} := \{B^{i_*-r} R^r Q_{t,u}^{(i,i_*), \{m\}}\} \{C^{i_*-r} R^r S_{t-m,u-m}^{(i_*+1,i_*)}\}^{-1} \quad (22)$$

followed by

$$\begin{aligned} BHB^{i_*-r-1}R^rS_{t,l}^{(i),\{m\}} &:= HB^{i_*-r-1}R^rS_{t,l}^{(i),\{m\}} - HB^{i_*-r}R^rS_{t,d^*+m}^{(i),\{m\}} \cdot \\ &\quad IC^{i_*-r-1}R^rS_{t-m,l-m}^{(i_*)+1}, \end{aligned} \quad (23)$$

$$\begin{aligned} BHB^{i_*-r-1}R^rQ_{t,l}^{\{m\}} &:= HB^{i_*-r-1}R^rQ_{t,l}^{\{m\}} - HB^{i_*-r}R^rQ_{t,d^*+m}^{\{m\}} \cdot \\ &\quad IC^{i_*-r-1}R^rS_{t-m,l-m}^{(i_*)+1}, \end{aligned} \quad (24)$$

$\vdots$

$$\begin{aligned} B^{i_*-r}HR^rS_{t,l}^{(i),\{m\}} &:= B^{i_*-r-1}HR^rS_{t,l}^{(i),\{m\}} - HB^{i_*-r}R^rS_{t,d^*+m}^{(i),\{m\}} \cdot \\ &\quad C^{i_*-r-1}IR^rS_{t-m,l-m}^{(i_*)+1}, \end{aligned}$$

$$\begin{aligned} B^{i_*-r}HR^rQ_{t,l}^{\{m\}} &:= B^{i_*-r-1}HR^rQ_{t,l}^{\{m\}} - HB^{i_*-r}R^rQ_{t,d^*+m}^{\{m\}} \cdot \\ &\quad C^{i_*-r-1}IR^rS_{t-m,l-m}^{(i_*)+1}, \end{aligned}$$

$$\begin{aligned} B^{i_*-r+1}R^rS_{t,l}^{(i,j),\{m\}} &:= B^{i_*-r}R^rS_{t,l}^{(i,j),\{m\}} - HB^{i_*-r}R^rS_{t,d^*+m}^{(i),\{m\}} \cdot \\ &\quad C^{i_*-r}R^rS_{t-m,l-m}^{(i_*)+1,j}, \end{aligned} \quad (25)$$

$$\begin{aligned} B^{i_*-r+1}R^rQ_{t,l}^{(j),\{m\}} &:= B^{i_*-r}R^rQ_{t,l}^{(j),\{m\}} - HB^{i_*-r}R^rQ_{t,d^*+m}^{\{m\}} \cdot \\ &\quad C^{i_*-r}R^rS_{t-m,l-m}^{(i_*)+1,j}, \end{aligned} \quad (26)$$

$$\begin{aligned} b^{i_*-r+1}r^rS_{t,l}^{(i),\{m\}} &:= b^{i_*-r}r^rS_{t,l}^{(i),\{m\}} - HB^{i_*-r}R^rS_{t,d^*+m}^{(i),\{m\}} \cdot \\ &\quad c^{i_*-r}r^rS_{t-m,l-m}^{(i_*)+1}, \end{aligned} \quad (27)$$

$$\begin{aligned} b^{i_*-r+1}r^rQ_{t,l}^{\{m\}} &:= b^{i_*-r}r^rQ_{t,l}^{\{m\}} - HB^{i_*-r}R^rQ_{t,d^*+m}^{\{m\}} \cdot \\ &\quad c^{i_*-r}r^rS_{t-m,l-m}^{(i_*)+1}; \end{aligned} \quad (28)$$

for  $r = 2, \dots, k$  only, also define

$$\begin{aligned} B^{i_*-r+1}OR^{r-1}S_{t,l}^{(i),\{m\}} &:= B^{i_*-r}OR^{r-1}S_{t,l}^{(i),\{m\}} - HB^{i_*-r}R^rS_{t,d^*+m}^{(i),\{m\}} \cdot \\ &\quad C^{i_*-r}OR^{r-1}S_{t-m,l-m}^{(i_*)+1}, \\ B^{i_*-r+1}OR^{r-1}Q_{t,l}^{\{m\}} &:= B^{i_*-r}OR^{r-1}Q_{t,l}^{\{m\}} - HB^{i_*-r}R^rQ_{t,d^*+m}^{\{m\}} \cdot \\ &\quad C^{i_*-r}OR^{r-1}S_{t-m,l-m}^{(i_*)+1}. \end{aligned}$$

In the equations above, it is defined that

$$IR^rS_{t,u}^{(i)} := \left\{ L_{i-r+1,1}^{((k+1)^{q-2-d})} (R^rS_{t,u}) \right\} \left\{ L_{2,1}^{((k+1)^{q-2-d})} (R^rS_{t,u}) \right\}^{-1}, \quad (29)$$

followed by

$$CR^rS_{t,l}^{(i,j)} := L_{i-r+1,j-r+1}^{((k+1)^{q-2-d})} (R^rS_{t,l}) - IR^rS_{t,d^*}^{(i)} \cdot L_{2,j-r+1}^{((k+1)^{q-2-d})} (R^rS_{t,l}), \quad (30)$$

$$c^rS_{t,l}^{(i)} := L_{i-r+1}^{((k+1)^{q-2-d})} (r^rS_{t,l}) - IR^rS_{t,d^*}^{(i)} \cdot L_2^{((k+1)^{q-2-d})} (r^rS_{t,l}); \quad (31)$$

for  $r = 2, \dots, k$  only, also define

$$COR^{r-1}S_{t,l}^{(i)} := L_{i-r+1,1}^{((k+1)^{q-2-d})}(OR^{r-1}S_{t,l}) - IR^rS_{t,d^*}^{(i)} \cdot L_{2,1}^{((k+1)^{q-2-d})}(OR^{r-1}S_{t,l}).$$

It is also defined for  $i_* = r+1, \dots, k$ , that

$$IC^{i_*-r}R^rS_{t,u}^{(i)} := \{C^{i_*-r}R^rS_{t,u}^{(i,i_*)}\}\{C^{i_*-r}R^rS_{t,u}^{(i_*+1,i_*)}\}^{-1}, \quad (32)$$

followed by

$$CIC^{i_*-r-1}R^rS_{t,l}^{(i)} := IC^{i_*-r-1}R^rS_{t,l}^{(i)} - IC^{i_*-r}R^rS_{t,d^*}^{(i)} \cdot IC^{i_*-r-1}R^rS_{t,l}^{(i_*+1)}, \quad (33)$$

$\vdots$

$$C^{i_*-r}IR^rS_{t,l}^{(i)} := C^{i_*-r-1}IR^rS_{t,l}^{(i)} - IC^{i_*-r}R^rS_{t,d^*}^{(i)} \cdot C^{i_*-r-1}IR^rS_{t,l}^{(i_*+1)},$$

$$C^{i_*-r+1}R^rS_{t,l}^{(i,j)} := C^{i_*-r}R^rS_{t,l}^{(i,j)} - IC^{i_*-r}R^rS_{t,d^*}^{(i)} \cdot C^{i_*-r}R^rS_{t,l}^{(i_*+1,j)}, \quad (34)$$

$$C^{i_*-r+1}r^rS_{t,l}^{(i)} := C^{i_*-r}r^rS_{t,l}^{(i)} - IC^{i_*-r}R^rS_{t,d^*}^{(i)} \cdot C^{i_*-r}r^rS_{t,l}^{(i_*+1)}; \quad (35)$$

for  $r = 2, \dots, k$  only, also define

$$C^{i_*-r+1}OR^{r-1}S_{t,l}^{(i)} := C^{i_*-r}OR^{r-1}S_{t,l}^{(i)} - IC^{i_*-r}R^rS_{t,d^*}^{(i)} \cdot C^{i_*-r}OR^{r-1}S_{t,l}^{(i_*+1)}.$$

For  $n = 1, 2, \dots, d^* - 2$  or  $n = d^* - 1$  and  $m = n+1, n+2, \dots, d^*$  (fixed  $r = 1, \dots, k$ ), define

$$HB^{n(k-r+1)}R^rS_{t,u}^{(i),\{m\}} := \{B^{n(k-r+1)}R^rS_{t,u}^{(i,r),\{m\}}\}\{B^{n(k-r+1)}R^rS_{t-m+n,u-m+n}^{(r+1,r),\{n\}}\}^{-1}, \quad (36)$$

$$HB^{n(k-r+1)}R^rQ_{t,u}^{\{m\}} := \{B^{n(k-r+1)}R^rQ_{t,u}^{(r),\{m\}}\}\{B^{n(k-r+1)}R^rS_{t-m+n,u-m+n}^{(r+1,r),\{n\}}\}^{-1}, \quad (37)$$

followed by

$$\begin{aligned} BHB^{n(k-r+1)-1}R^rS_{t,l}^{(i),\{m\}} &:= HB^{n(k-r+1)-1}R^rS_{t,l}^{(i),\{m\}} - HB^{n(k-r+1)}R^rS_{t,d^*+m-n}^{(i),\{m\}} \cdot \\ &\quad HB^{n(k-r+1)-1}R^rS_{t-m+n,l-m+n}^{(r+1),\{n\}}, \end{aligned} \quad (38)$$

$$\begin{aligned} BHB^{n(k-r+1)-1}R^rQ_{t,l}^{\{m\}} &:= HB^{n(k-r+1)-1}R^rQ_{t,l}^{\{m\}} - HB^{n(k-r+1)}R^rQ_{t,d^*+m-n}^{\{m\}} \cdot \\ &\quad HB^{n(k-r+1)-1}R^rS_{t-m+n,l-m+n}^{(r+1),\{n\}}, \end{aligned} \quad (39)$$

$$\begin{aligned} B^2HB^{n(k-r+1)-2}R^rS_{t,l}^{(i),\{m\}} &:= BHB^{n(k-r+1)-2}R^rS_{t,l}^{(i),\{m\}} - HB^{n(k-r+1)}R^rS_{t,d^*+m-n}^{(i),\{m\}} \cdot \\ &\quad BHB^{n(k-r+1)-2}R^rS_{t-m+n,l-m+n}^{(r+1),\{n\}}, \end{aligned} \quad (40)$$

$$\begin{aligned} B^2HB^{n(k-r+1)-2}R^rQ_{t,l}^{\{m\}} &:= BHB^{n(k-r+1)-2}R^rQ_{t,l}^{\{m\}} - HB^{n(k-r+1)}R^rQ_{t,d^*+m-n}^{\{m\}} \cdot \\ &\quad BHB^{n(k-r+1)-2}R^rS_{t-m+n,l-m+n}^{(r+1),\{n\}}, \end{aligned} \quad (41)$$

$\vdots$

$$\begin{aligned} B^{n(k-r+1)}HR^rS_{t,l}^{(i),\{m\}} &:= B^{n(k-r+1)-1}HR^rS_{t,l}^{(i),\{m\}} - HB^{n(k-r+1)}R^rS_{t,d^*+m-n}^{(i),\{m\}} \cdot \\ &\quad B^{n(k-r+1)-1}HR^rS_{t-m+n,l-m+n}^{(r+1),\{n\}}, \end{aligned} \quad (42)$$

$$\begin{aligned} B^{n(k-r+1)}HR^rQ_{t,l}^{\{m\}} &:= B^{n(k-r+1)-1}HR^rQ_{t,l}^{\{m\}} - HB^{n(k-r+1)}R^rQ_{t,d^*+m-n}^{\{m\}} \cdot \\ &\quad B^{n(k-r+1)-1}HR^rS_{t-m+n,l-m+n}^{(r+1),\{n\}}, \end{aligned} \quad (43)$$

$$\begin{aligned} B^{n(k-r+1)+1}R^rS_{t,l}^{(i,j),\{m\}} &:= B^{n(k-r+1)}R^rS_{t,l}^{(i,j),\{m\}} - HB^{n(k-r+1)}R^rS_{t,d^*+m-n}^{(i),\{m\}} \cdot \\ &\quad B^{n(k-r+1)}R^rS_{t-m+n,l-m+n}^{(r+1,j),\{n\}}, \end{aligned} \quad (44)$$

$$\begin{aligned} B^{n(k-r+1)+1}R^rQ_{t,l}^{(j),\{m\}} &:= B^{n(k-r+1)}R^rQ_{t,l}^{(j),\{m\}} - HB^{n(k-r+1)}R^rQ_{t,d^*+m-n}^{\{m\}} \cdot \\ &\quad B^{n(k-r+1)}R^rS_{t-m+n,l-m+n}^{(r+1,j),\{n\}}, \end{aligned} \quad (45)$$

$$\begin{aligned} b^{n(k-r+1)+1}r^rS_{t,l}^{(i),\{m\}} &:= b^{n(k-r+1)}r^rS_{t,l}^{(i),\{m\}} - HB^{n(k-r+1)}R^rS_{t,d^*+m-n}^{(i),\{m\}} \cdot \\ &\quad b^{n(k-r+1)}r^rS_{t-m+n,l-m+n}^{(r+1),\{n\}}, \end{aligned} \quad (46)$$

$$\begin{aligned} b^{n(k-r+1)+1}r^rq_{t,l}^{\{m\}} &:= b^{n(k-r+1)}r^rq_{t,l}^{\{m\}} - HB^{n(k-r+1)}R^rQ_{t,d^*+m-n}^{\{m\}} \cdot \\ &\quad b^{n(k-r+1)}r^rS_{t-m+n,l-m+n}^{(r+1),\{n\}}, \end{aligned} \quad (47)$$

$$\begin{aligned} b^{(n-1)(k-r+1)+1}r^rS_{t,l}^{(i),(\{m\},\{n\})} &:= b^{(n-1)(k-r+1)}r^rS_{t,l}^{(i),(\{m\},\{n-1\})} - HB^{n(k-r+1)}R^rS_{t,d^*+m-n}^{(i),\{m\}} \cdot \\ &\quad b^{(n-1)(k-r+1)}r^rS_{t-m+n,l-m+n}^{(r+1),(\{n\},\{n-1\})}, (\text{if } n = 1, \text{ omit}) \end{aligned}$$

$$\begin{aligned} b^{(n-1)(k-r+1)+1}r^rq_{t,l}^{(\{m\},\{n\})} &:= b^{(n-1)(k-r+1)}r^rq_{t,l}^{(\{m\},\{n-1\})} - HB^{n(k-r+1)}R^rQ_{t,d^*+m-n}^{\{m\}} \cdot \\ &\quad b^{(n-1)(k-r+1)}r^rS_{t-m+n,l-m+n}^{(r+1),(\{n\},\{n-1\})}, (\text{if } n = 1, \text{ omit}) \end{aligned}$$

$\vdots$

$$\begin{aligned}
b^{(k-r+1)+1} r^r s_{t,l}^{(i),(\{m\},\{n\})} &:= b^{(k-r+1)} r^r s_{t,l}^{(i),(\{m\},\{n-1\})} - HB^{n(k-r+1)} R^r S_{t,d^*+m-n}^{(i),\{m\}} \cdot \\
&\quad b^{(k-r+1)} r^r s_{t-m+n,l-m+n}^{(r+1),(\{n\},\{n-1\})}, (\text{if } n=1, \text{ omit}) \\
b^{(k-r+1)+1} r^r q_{t,l}^{\{m\},\{n\}} &:= b^{(k-r+1)} r^r q_{t,l}^{\{m\},\{n-1\}} - HB^{n(k-r+1)} R^r Q_{t,d^*+m-n}^{\{m\}} \cdot \\
&\quad b^{(k-r+1)} r^r s_{t-m+n,l-m+n}^{(r+1),(\{n\},\{n-1\})}, (\text{if } n=1, \text{ omit}) \\
br^r s_{t,l}^{(i),(\{m\},\{n\})} &:= L_{i-r+1}^{((k+1)^{q-2-d})} (r^r s_{t,l}^{\{m\}}) - HB^{n(k-r+1)} R^r S_{t,d^*+m-n}^{(i),\{m\}} \cdot \\
&\quad L_2^{((k+1)^{q-2-d})} (r^r s_{t-m+n,l-m+n}^{\{n\}}), \tag{48} \\
br^r q_{t,l}^{\{m\},\{n\}} &:= r^r q_{t,l}^{\{m\}} - HB^{n(k-r+1)} R^r Q_{t,d^*+m-n}^{\{m\}} \cdot \\
&\quad L_2^{((k+1)^{q-2-d})} (r^r s_{t-m+n,l-m+n}^{\{n\}}); \tag{49}
\end{aligned}$$

for  $r = 2, \dots, k$  only, also define

$$\begin{aligned}
B^{n(k-r+1)+1} OR^{r-1} S_{t,l}^{(i),\{m\}} &:= B^{n(k-r+1)} OR^{r-1} S_{t,l}^{(i),\{m\}} - HB^{n(k-r+1)} R^r S_{t,d^*+m-n}^{(i),\{m\}} \cdot \\
&\quad B^{n(k-r+1)} OR^{r-1} S_{t-m+n,l-m+n}^{(r+1),\{n\}}, \\
B^{n(k-r+1)+1} OR^{r-1} Q_{t,l}^{\{m\}} &:= B^{n(k-r+1)} OR^{r-1} Q_{t,l}^{\{m\}} - HB^{n(k-r+1)} R^r Q_{t,d^*+m-n}^{\{m\}} \cdot \\
&\quad B^{n(k-r+1)} OR^{r-1} S_{t-m+n,l-m+n}^{(r+1),\{n\}}.
\end{aligned}$$

Next, for  $i_* = r+1, \dots, k$ , define

$$\begin{aligned}
HB^{i_*-r+n(k-r+1)} R^r S_{t,u}^{(i),\{m\}} &:= \{B^{i_*-r+n(k-r+1)} R^r S_{t,u}^{(i,i_*),\{m\}}\} \\
&\quad \{C^{i_*-r} B^{n(k-r+1)} R^r S_{t-m+n,u-m+n}^{(i_*+1,i_*)}\}^{-1}, \tag{50}
\end{aligned}$$

$$\begin{aligned}
HB^{i_*-r+n(k-r+1)} R^r Q_{t,u}^{\{m\}} &:= \{B^{i_*-r+n(k-r+1)} R^r Q_{t,u}^{(i_*),\{m\}}\} \\
&\quad \{C^{i_*-r} B^{n(k-r+1)} R^r S_{t-m+n,u-m+n}^{(i_*+1,i_*)}\}^{-1}, \tag{51}
\end{aligned}$$

followed by



$$BHB^{i_*-r-1+n(k-r+1)} R^r S_{t,l}^{(i),\{m\}} := HB^{i_*-r-1+n(k-r+1)} R^r S_{t,l}^{(i),\{m\}} - HB^{i_*-r+n(k-r+1)} R^r S_{t,d^*+m-n}^{(i),\{m\}} \cdot IC^{i_*-r-1} B^{n(k-r+1)} R^r S_{t-m+n,l-m+n}^{(i_*+1)}, \quad (52)$$

$$BHB^{i_*-r-1+n(k-r+1)} R^r Q_{t,l}^{\{m\}} := HB^{i_*-r-1+n(k-r+1)} R^r Q_{t,l}^{\{m\}} - HB^{i_*-r+n(k-r+1)} R^r Q_{t,d^*+m-n}^{\{m\}} \cdot IC^{i_*-r-1} B^{n(k-r+1)} R^r S_{t-m+n,l-m+n}^{(i_*+1)}, \quad (53)$$

⋮

$$B^{i_*-r-1} HB^{n(k-r+1)+1} R^r S_{t,l}^{(i),\{m\}} := B^{i_*-r-2} HB^{n(k-r+1)+1} R^r S_{t,l}^{(i),\{m\}} - HB^{i_*-r+n(k-r+1)} R^r S_{t,d^*+m-n}^{(i),\{m\}} \cdot C^{i_*-r-2} IB^{n(k-r+1)} R^r S_{t-m+n,l-m+n}^{(i_*+1)},$$

$$B^{i_*-r-1} HB^{n(k-r+1)+1} R^r Q_{t,l}^{\{m\}} := B^{i_*-r-2} HB^{n(k-r+1)+1} R^r Q_{t,l}^{\{m\}} - HB^{i_*-r+n(k-r+1)} R^r Q_{t,d^*+m-n}^{\{m\}} \cdot C^{i_*-r-2} IB^{n(k-r+1)} R^r S_{t-m+n,l-m+n}^{(i_*+1)},$$

$$B^{i_*-r} HB^{n(k-r+1)} R^r S_{t,l}^{(i),\{m\}} := B^{i_*-r-1} HB^{n(k-r+1)} R^r S_{t,l}^{(i),\{m\}} - HB^{i_*-r+n(k-r+1)} R^r S_{t,d^*+m-n}^{(i),\{m\}} \cdot C^{i_*-r-1} IB^{n(k-r+1)} R^r S_{t-m+n,l-m+n}^{(i_*+1)}, \quad (54)$$

$$B^{i_*-r} HB^{n(k-r+1)} R^r Q_{t,l}^{\{m\}} := B^{i_*-r-1} HB^{n(k-r+1)} R^r Q_{t,l}^{\{m\}} - HB^{i_*-r+n(k-r+1)} R^r Q_{t,d^*+m-n}^{\{m\}} \cdot C^{i_*-r-1} IB^{n(k-r+1)} R^r S_{t-m+n,l-m+n}^{(i_*+1)}, \quad (55)$$

$$B^{i_*-r+1} HB^{n(k-r+1)-1} R^r S_{t,l}^{(i),\{m\}} := B^{i_*-r} HB^{n(k-r+1)-1} R^r S_{t,l}^{(i),\{m\}} - HB^{i_*-r+n(k-r+1)} R^r S_{t,d^*+m-n}^{(i),\{m\}} \cdot C^{i_*-r} HB^{n(k-r+1)-1} R^r S_{t-m+n,l-m+n}^{(i_*+1)}, \quad (56)$$

$$B^{i_*-r+1} HB^{n(k-r+1)-1} R^r Q_{t,l}^{\{m\}} := B^{i_*-r} HB^{n(k-r+1)-1} R^r Q_{t,l}^{\{m\}} - HB^{i_*-r+n(k-r+1)} R^r Q_{t,d^*+m-n}^{\{m\}} \cdot C^{i_*-r} HB^{n(k-r+1)-1} R^r S_{t-m+n,l-m+n}^{(i_*+1)}, \quad (57)$$

⋮

$$B^{i_*-r+1+n(k-r+1)-1} HR^r S_{t,l}^{(i),\{m\}} := B^{i_*-r+n(k-r+1)-1} HR^r S_{t,l}^{(i),\{m\}} - HB^{i_*-r+n(k-r+1)} R^r S_{t,d^*+m-n}^{(i),\{m\}} \cdot C^{i_*-r} B^{n(k-r+1)-1} HR^r S_{t-m+n,l-m+n}^{(i_*+1)}, \quad (58)$$

$$B^{i_*-r+1+n(k-r+1)-1} HR^r Q_{t,l}^{\{m\}} := B^{i_*-r+n(k-r+1)-1} HR^r Q_{t,l}^{\{m\}} - HB^{i_*-r+n(k-r+1)} R^r Q_{t,d^*+m-n}^{\{m\}} \cdot C^{i_*-r} B^{n(k-r+1)-1} HR^r S_{t-m+n,l-m+n}^{(i_*+1)}, \quad (59)$$

$$B^{i_*-r+1+n(k-r+1)} R^r S_{t,l}^{(i,j),\{m\}} := B^{i_*-r+n(k-r+1)} R^r S_{t,l}^{(i,j),\{m\}} - HB^{i_*-r+n(k-r+1)} R^r S_{t,d^*+m-n}^{(i,j),\{m\}} \cdot C^{i_*-r} B^{n(k-r+1)} R^r S_{t-m+n,l-m+n}^{(i_*+1,j)}, \quad (60)$$

$$B^{i_*-r+1+n(k-r+1)} R^r Q_{t,l}^{(j),\{m\}} := B^{i_*-r+n(k-r+1)} R^r Q_{t,l}^{(j),\{m\}} - HB^{i_*-r+n(k-r+1)} R^r Q_{t,d^*+m-n}^{(j),\{m\}} \cdot C^{i_*-r} B^{n(k-r+1)} R^r S_{t-m+n,l-m+n}^{(i_*+1,j)}, \quad (61)$$

$$b^{i_*-r+1+n(k-r+1)} r^r s_{t,l}^{(i),\{m\}} := b^{i_*-r+n(k-r+1)} r^r s_{t,l}^{(i),\{m\}} - HB^{i_*-r+n(k-r+1)} R^r S_{t,d^*+m-n}^{(i),\{m\}} \cdot c^{i_*-r} b^{n(k-r+1)} r^r s_{t-m+n,l-m+n}^{(i_*,+1)}, \quad (62)$$

$$b^{i_*-r+1+n(k-r+1)} r^r q_{t,l}^{\{m\}} := b^{i_*-r+n(k-r+1)} r^r q_{t,l}^{\{m\}} - HB^{i_*-r+n(k-r+1)} R^r Q_{t,d^*+m-n}^{\{m\}} \cdot c^{i_*-r} b^{n(k-r+1)} r^r s_{t-m+n,l-m+n}^{(i_*,+1)}, \quad (63)$$

$$b^{i_*-r+1+(n-1)(k-r+1)} r^r s_{t,l}^{(i),(\{m\},\{n\})} := b^{i_*-r+(n-1)(k-r+1)} r^r s_{t,l}^{(i),(\{m\},\{n\})} - HB^{i_*-r+n(k-r+1)} R^r S_{t,d^*+m-n}^{(i),\{m\}} \cdot c^{i_*-r} b^{(n-1)(k-r+1)} r^r s_{t-m+n,l-m+n}^{(i_*,+1),\{n\}},$$

$$b^{i_*-r+1+(n-1)(k-r+1)} r^r q_{t,l}^{(\{m\},\{n\})} := b^{i_*-r+(n-1)(k-r+1)} r^r q_{t,l}^{(\{m\},\{n\})} - HB^{i_*-r+n(k-r+1)} R^r Q_{t,d^*+m-n}^{(\{m\},\{n\})} \cdot c^{i_*-r} b^{(n-1)(k-r+1)} r^r s_{t-m+n,l-m+n}^{(i_*,+1),\{n\}},$$

$$\vdots$$

$$b^{i_*-r+1} r^r s_{t,l}^{(i),(\{m\},\{n\})} := b^{i_*-r} r^r s_{t,l}^{(i),(\{m\},\{n\})} - HB^{i_*-r+n(k-r+1)} R^r S_{t,d^*+m-n}^{(i),\{m\}} \cdot c^{i_*-r} r^r s_{t-m+n,l-m+n}^{(i_*,+1),\{n\}}, \quad (64)$$

$$b^{i_*-r+1} r^r q_{t,l}^{(\{m\},\{n\})} := b^{i_*-r} r^r q_{t,l}^{(\{m\},\{n\})} - HB^{i_*-r+n(k-r+1)} R^r Q_{t,d^*+m-n}^{\{m\}} \cdot c^{i_*-r} r^r s_{t-m+n,l-m+n}^{(i_*,+1),\{n\}}; \quad (65)$$

for  $r = 2, \dots, k$  only, also define

$$B^{i_*-r+1+n(k-r+1)} OR^{r-1} S_{t,l}^{(i),\{m\}} := B^{i_*-r+n(k-r+1)} OR^{r-1} S_{t,l}^{(i),\{m\}} - HB^{i_*-r+n(k-r+1)} R^r S_{t,d^*+m-n}^{(i),\{m\}} \cdot C^{i_*-r} B^{n(k-r+1)} OR^{r-1} S_{t-m+n,l-m+n}^{(i_*,+1)},$$

$$B^{i_*-r+1+n(k-r+1)} OR^{r-1} Q_{t,l}^{\{m\}} := B^{i_*-r+n(k-r+1)} OR^{r-1} Q_{t,l}^{\{m\}} - HB^{i_*-r+n(k-r+1)} R^r Q_{t,d^*+m-n}^{\{m\}} \cdot C^{i_*-r} B^{n(k-r+1)} OR^{r-1} S_{t-m+n,l-m+n}^{(i_*,+1)}.$$

In the equations above, it is defined that

$$IB^{n(k-r+1)} R^r S_{t,u}^{(i)} := \{B^{n(k-r+1)} R^r S_{t,u}^{(i,r),\{n\}}\} \{B^{n(k-r+1)} R^r S_{t,u}^{(r+1,r),\{n\}}\}^{-1}, \quad (66)$$

followed by

$$CHB^{k-r+(n-1)(k-r+1)} R^r S_{t,l}^{(i)} := HB^{k-r+(n-1)(k-r+1)} R^r S_{t,l}^{(i),\{n\}} - IB^{n(k-r+1)} R^r S_{t,d^*}^{(i)} \cdot HB^{k-r+(n-1)(k-r+1)} R^r S_{t,l}^{(r+1),\{n\}}, \quad (67)$$

$$\vdots$$

$$CB^{k-r} HB^{(n-1)(k-r+1)} R^r S_{t,l}^{(i)} := B^{k-r} HB^{(n-1)(k-r+1)} R^r S_{t,l}^{(i),\{n\}} - IB^{n(k-r+1)} R^r S_{t,d^*}^{(i)} \cdot B^{k-r} HB^{(n-1)(k-r+1)} R^r S_{t,l}^{(r+1),\{n\}},$$

$$\vdots$$

$$CB^{k-r+(n-1)(k-r+1)} HR^r S_{t,l}^{(i)} := B^{k-r+(n-1)(k-r+1)} HR^r S_{t,l}^{(i),\{n\}} - IB^{n(k-r+1)} R^r S_{t,d^*}^{(i)} \cdot B^{k-r+(n-1)(k-r+1)} HR^r S_{t,l}^{(r+1),\{n\}}, \quad (68)$$

$$CB^{n(k-r+1)}R^rS_{t,l}^{(i,j)} := B^{n(k-r+1)}R^rS_{t,l}^{(i,j),\{n\}} - IB^{n(k-r+1)}R^rS_{t,d^*}^{(i)} \cdot B^{n(k-r+1)}R^rS_{t,l}^{(r+1,j),\{n\}}, \quad (69)$$

$$cb^{n(k-r+1)}r^rS_{t,l}^{(i)} := b^{n(k-r+1)}r^rS_{t,l}^{(i),\{n\}} - IB^{n(k-r+1)}R^rS_{t,d^*}^{(i)} \cdot b^{n(k-r+1)}r^rS_{t,l}^{(r+1),\{n\}}, \quad (70)$$

$$\begin{aligned} cb^{(n-1)(k-r+1)}r^rS_{t,l}^{(i),\{n\}} &:= b^{(n-1)(k-r+1)}r^rS_{t,l}^{(i),\{n\},\{n-1\}} - IB^{n(k-r+1)}R^rS_{t,d^*}^{(i)} \cdot b^{(n-1)(k-r+1)}r^rS_{t,l}^{(r+1),\{n\},\{n-1\}}, \text{ (if } n=1, \text{ omit)} \\ &\vdots \\ cb^{k-r+1}r^rS_{t,l}^{(i),\{n\}} &:= b^{k-r+1}r^rS_{t,l}^{(i),\{n\},\{n-1\}} - IB^{n(k-r+1)}R^rS_{t,d^*}^{(i)} \cdot b^{k-r+1}r^rS_{t,l}^{(r+1),\{n\},\{n-1\}}, \text{ (if } n=1, \text{ omit)} \\ cr^rS_{t,l}^{(i),\{n\}} &:= L_{i-r+1}^{((k+1)^{q-2-d})}(r^rS_{t,l}^{\{n\}}) - IB^{n(k-r+1)}R^rS_{t,d^*}^{(i)} \cdot L_2^{((k+1)^{q-2-d})}(r^rS_{t,l}^{\{n\}}); \end{aligned} \quad (71)$$

for  $r = 2, \dots, k$  only, also define

$$CB^{n(k-r+1)}OR^{r-1}S_{t,l}^{(i)} := B^{n(k-r+1)}OR^{r-1}S_{t,l}^{(i),\{n\}} - IB^{n(k-r+1)}R^rS_{t,d^*}^{(i)} \cdot B^{n(k-r+1)}OR^{r-1}S_{t,l}^{(r+1),\{n\}}.$$

It is also defined for  $i_* = r+1, \dots, k$ , that

$$IC^{i_*-r}B^{n(k-r+1)}R^rS_{t,u}^{(i)} := \{C^{i_*-r}B^{n(k-r+1)}R^rS_{t,u}^{(i,i_*)}\}\{C^{i_*-r}B^{n(k-r+1)}R^rS_{t,u}^{(i_*+1,i_*)}\}^{-1} \quad (72)$$

followed by

$$\begin{aligned} CIC^{i_*-r-1}B^{n(k-r+1)}R^rS_{t,l}^{(i)} &:= IC^{i_*-r-1}B^{n(k-r+1)}R^rS_{t,l}^{(i)} - \\ &IC^{i_*-r}B^{n(k-r+1)}R^rS_{t,d^*}^{(i)} \cdot IC^{i_*-r-1}B^{n(k-r+1)}R^rS_{t,l}^{(i_*+1)}, \end{aligned} \quad (73)$$

$\vdots$

$$\begin{aligned} C^{i_*-r}IB^{n(k-r+1)}R^rS_{t,l}^{(i)} &:= C^{i_*-r-1}IB^{n(k-r+1)}R^rS_{t,l}^{(i)} - \\ &IC^{i_*-r}B^{n(k-r+1)}R^rS_{t,d^*}^{(i)} \cdot C^{i_*-r-1}IB^{n(k-r+1)}R^rS_{t,l}^{(i_*+1)}, \\ C^{i_*-r+1}HB^{k-r+(n-1)(k-r+1)}R^rS_{t,l}^{(i)} &:= C^{i_*-r}HB^{k-r+(n-1)(k-r+1)}R^rS_{t,l}^{(i)} - \\ &IC^{i_*-r}B^{n(k-r+1)}R^rS_{t,d^*}^{(i)} \cdot C^{i_*-r}HB^{k-r+(n-1)(k-r+1)}R^rS_{t,l}^{(i_*+1)}, \end{aligned} \quad (74)$$

$\vdots$

$$\begin{aligned} C^{i_*-r+1}B^{k-r+(n-1)(k-r+1)}HR^rS_{t,l}^{(i)} &:= C^{i_*-r}B^{k-r+(n-1)(k-r+1)}HR^rS_{t,l}^{(i)} - \\ &IC^{i_*-r}B^{n(k-r+1)}R^rS_{t,d^*}^{(i)} \cdot C^{i_*-r}B^{k-r+(n-1)(k-r+1)}HR^rS_{t,l}^{(i_*+1)}, \\ C^{i_*-r+1}B^{n(k-r+1)}R^rS_{t,l}^{(i,j)} &:= C^{i_*-r}B^{n(k-r+1)}R^rS_{t,l}^{(i,j)} - \\ &IC^{i_*-r}B^{n(k-r+1)}R^rS_{t,d^*}^{(i)} \cdot C^{i_*-r}B^{n(k-r+1)}R^rS_{t,l}^{(i_*+1,j)}, \end{aligned} \quad (75)$$

$$\begin{aligned}
c^{i_*-r+1} b^{n(k-r+1)} r^r s_{t,l}^{(i)} &:= c^{i_*-r} b^{n(k-r+1)} r^r s_{t,l}^{(i)} - IC^{i_*-r} B^{n(k-r+1)} R^r S_{t,d^*}^{(i)} \cdot \\
&\quad c^{i_*-r} b^{n(k-r+1)} r^r s_{t,l}^{(i_*+1)}, \\
c^{i_*-r+1} b^{(n-1)(k-r+1)} r^r s_{t,l}^{(i),\{n\}} &:= c^{i_*-r} b^{(n-1)(k-r+1)} r^r s_{t,l}^{(i),\{n\}} - IC^{i_*-r} B^{n(k-r+1)} R^r S_{t,d^*}^{(i)} \cdot \\
&\quad c^{i_*-r} b^{(n-1)(k-r+1)} r^r s_{t,l}^{(i_*+1),\{n\}}, \\
&\quad \vdots \\
c^{i_*-r+1} r^r s_{t,l}^{(i),\{n\}} &:= c^{i_*-r} r^r s_{t,l}^{(i),\{n\}} - IC^{i_*-r} B^{n(k-r+1)} R^r S_{t,d^*}^{(i)} \cdot c^{i_*-r} r^r s_{t,l}^{(i_*+1),\{n\}},
\end{aligned} \tag{76}$$

$$\tag{77}$$

for  $r = 2, \dots, k$  only, also define

$$\begin{aligned}
C^{i_*-r+1} B^{n(k-r+1)} O R^{r-1} S_{t,l}^{(i)} &:= C^{i_*-r} B^{n(k-r+1)} O R^{r-1} S_{t,l}^{(i)} - IC^{i_*-r} B^{n(k-r+1)} R^r S_{t,d^*}^{(i)} \cdot \\
&\quad C^{i_*-r} B^{n(k-r+1)} O R^{r-1} S_{t,l}^{(i_*+1)}.
\end{aligned}$$

- For the proof (of Proposition 4.1):

(a) This is none other than a specific way (based on the current definitions) of going from a multivariate AR(1) to the interested univariate AR of a higher order that is required. Next, a very short sketch of proof is provided on how this is done.

A series of inductions would normally take place (nested one inside the other), the first one concerning the  $d$  as below.

$d = 0$

In this case, the main statement of the proposition part (i), i.e.

$$\begin{aligned}
V S_t^{(q-2-d)} &= \sum_{l=1}^{d^*} r p_{t,l} R S(d)_{t,l} V S_{t-l}^{(q-2-d)} + \\
&\quad \sum_{l=1}^{d^*} r p_{t,l} \left( \prod_{i=1}^p f_0(X_{t-i-l}) \right) r s(d)_{t,l} q_{t-1-l}^{(0)}
\end{aligned} \tag{78}$$

is a direct consequence of

$$V P_t = \frac{1}{p_{t-1}} \left[ L_t \cdot V P_{t-1} + \left( \prod_{l=1}^p f_0(X_{t-1-l}) \right) l_t \cdot q_{t-2}^{(0)} \right] :$$

(as in the main text) when  $RS(0)_{t,1} := L_t$  and  $rs(0)_{t,1} := l_t$ . In the other hand, straight

from

$$q_{t-1}^{(0)} = \frac{\pi_0}{p_{t-1}} \left[ p_{t-1} - \sum_{m=1}^k S_{t-1}^{(v_m)} - \sum_{m=1}^k S_{t-1}^{(0, v_m)} - \dots - \sum_{m=1}^k S_{t-1}^{(0_{q-3}, v_m)} - \sum_{m=1}^k P_{t-1}^{(0_{q-2}, v_m)} + \left( \prod_{l=1}^p f_0(X_{t-1-l}) \right) (f_0(X_{t-1}) - \pi_{X_{t-1}}) q_{t-2}^{(0)} \right]$$

(as in the main text), the forms of  $RQ(0)_{t,1}$  and

$$rq(0)_{t,1} := f_0(X_{t-1}) - \pi_{X_{t-1}} = \begin{cases} 1 - \pi_0, & \text{if } X_{t-1} = 0, \\ -\pi_{v_m}, & \text{if } X_{t-1} = v_m, \ m = 1, \dots, k \end{cases}$$

become obvious.

$d = w$

Write  $w^* = (k+1)^w$ . Accept the statements (78) and

$$q_{t-1}^{(0)} = \pi_0 \left\{ \sum_{l=1}^{d^*} rp_{t,l} RQ(d)_{t,l} VS_{t-l}^{(q-2-d)} + \sum_{l=1}^{d^*} rp_{t,l} \left( \prod_{i=1}^p f_0(X_{t-i-l}) \right) rq(d)_{t,l} q_{t-1-l}^{(0)} \right\}, \quad (79)$$

when  $d = w$ , where it can be  $w = 1, \dots, q-2$ .

$d = w + 1$

Write for convenience  $VS_t^{(q-2-w)} \equiv VS_t$ ,  $VS_t^{(q-2-(w+1))} \equiv VS_t^{((-1))}$  and  $RS(w)_{t,l} \equiv RS_{t,l}$ ,  $rs(w)_{t,l} \equiv rs_{t,l}$ ,  $RQ(w)_{t,l} \equiv RQ_{t,l}$ ,  $rq(w)_{t,l} \equiv rq_{t,l}$ ; in general omit the dimensionality  $w$  within this loop and simplify the operator  $L^{((k+1)^{q-2-w})} \equiv L$ .

It holds that

$$VS_t = \sum_{l=1}^{w^*} rp_{t,l} RS_{t,l} VS_{t-l} + \sum_{l=1}^{w^*} rp_{t,l} \left( \prod_{i=1}^p f_0(X_{t-ii-l}) \right) rs_{t,l} q_{t-1-l}^{(0)};$$

first there is substitution of  $VS_{t-1}$  in the equations for  $VS_t$  and  $\{q_{t-1}^{(0)}/\pi_0\}$  to obtain  $RS_{t,l}^{\{1\}}$ ,  $rs_{t,l}^{\{1\}}$  and  $RQ_{t,l}^{\{1\}}$ ,  $rq_{t,l}^{\{1\}}$ , respectively; next there is substitution of  $VS_{t-2}$ , and then of  $VS_{t-3}$  and so on, to determine  $RS_{t,l}^{\{m\}}$  (as in (1)),  $rs_{t,l}^{\{m\}}$  (as in (4) when  $r = 0$ ), and  $RQ_{t,l}^{\{m\}}$  (as in (5)),  $rq_{t,l}^{\{m\}}$  (as in (8) when  $r = 0$ ).

Then  $VS_t^{(i)}$ ,  $i = 1, \dots, k$ ,  $VS_t^{((-1))}$  and  $\{q_{t-1}^{(0)}/\pi_0\}$  can be re-expressed from each one of these equations. Move from the ‘ $m$ -step’ to the ‘basic step’ of the proposition.

( $r = 1$ ):

$< n = 0 >$ : first  $vS_{t-w^*}^{(1)}$  is solved from the equation for  $vS_t^{(2)}$  (no  $m$ ); then the result is plugged in  $vS_t^{(i)}$ ,  $i = 3, \dots, k$  and  $VS_t^{((-1))}$  (no  $m$ ) yielding (29) and (30), (31) when  $r = 1$ ; from the newly derived results,  $vS_{t-w^*}^{(2)}$  is solved from the equation for  $vS_t^{(3)}$  and the result is plugged in (the newly derived)  $vS_t^{(i)}$ ,  $i = 4, \dots, k$  and  $VS_t^{((-1))}$  yielding (32) and (33), (34), (35) when  $r = 1$ ,  $i_* - r = 1$ . This goes on until

$$\begin{aligned}
vS_{t-w^*}^{(k)} = & \{rp_{t,w^*}\}^{-1} \{C^{k-1}RS_{t,w^*}^{(k+1,k)}\}^{-1} \left\{ VS_t^{((-1))} - IC^{k-2}RS_{t,w^*}^{(k+1)} vS_t^{(k)} - \right. \\
& CIC^{k-3}RS_{t,w^*}^{(k+1)} vS_t^{(k-1)} - \dots - C^{k-2}IRS_{t,w^*}^{(k+1)} vS_t^{(2)} - \\
& \sum_{j=1}^k \sum_{l=1}^{w^*-1} rp_{t,l} C^{k-1}RS_{t,l}^{(k+1,j)} vS_{t-l}^{(j)} - \\
& \sum_{l=1}^{w^*} rp_{t,l} C^{k-1}RS_{t,l}^{(k+1,k+1)} VS_{t-l}^{((-1))} - \\
& \left. \sum_{l=1}^{w^*} rp_{t,l} \left( \prod_{ii=1}^p f_0(X_{t-ii-l}) \right) c^{k-1}rs_{t,l}^{(k+1)} q_{t-1-l}^{(0)} \right\}
\end{aligned}$$

is the last one that is solved from  $VS_t^{((-1))}$ .

Secondly for  $m \in \mathbb{N}$ , start from the equations for  $vS_t^{(i)}$ ,  $i = 2, \dots, k$ ,  $VS_t^{((-1))}$  and  $\{q_{t-1}^{(0)}/\pi_0\}$  as they were obtained from the ‘ $m$ -step’ and repeat a similar process:  $vS_{t-m-w^*}^{(1)}$  (this is the  $vS_{t-w^*}^{(1)}$  that was solved already but for  $t = t - m$ ) is plugged in those versions yielding (15), (16) and (17), (19), (18), (20) when  $r = 1$ ; next, in these versions of  $vS_t^{(i)}$ ,  $VS_t^{((-1))}$  and  $\{q_{t-1}^{(0)}/\pi_0\}$  that were just computed,  $vS_{t-m-w^*}^{(2)}$  (i.e. the  $vS_{t-w^*}^{(2)}$  from before but for  $t = t - m$ ) is plugged in, yielding (21), (22) and (23), (25), (27), (24), (26), (28) when  $r = 1$ ,  $i_* - r = 1$ . This goes on ( $i_* = r + 2, \dots, k$ ) until it will be written in the end, that

$$\begin{aligned}
vS_t^{(i)} = & rp_{t,m} HB^{k-1}RS_{t,w^*+m}^{(i),\{m\}} VS_{t-m}^{((-1))} + rp_{t,m} BHB^{k-2}RS_{t,w^*+m}^{(i),\{m\}} vS_{t-m}^{(k)} + \\
& rp_{t,m} B^2HB^{k-3}RS_{t,w^*+m}^{(i),\{m\}} vS_{t-m}^{(k-1)} + \dots + rp_{t,m} B^{k-1}HRS_{t,w^*+m}^{(i),\{m\}} vS_{t-m}^{(2)} + \\
& \sum_{j=1}^k \sum_{l=1+m}^{w^*+m-1} rp_{t,l} B^k RS_{t,l}^{(i,j),\{m\}} vS_{t-l}^{(j)} + \\
& \sum_{l=1+m}^{w^*+m} rp_{t,l} B^k RS_{t,l}^{(i,k+1),\{m\}} VS_{t-l}^{((-1))} + \\
& \sum_{l=1+m}^{w^*+m} rp_{t,l} \left( \prod_{ii=1}^p f_0(X_{t-ii-l}) \right) b^k rs_{t,l}^{(i),\{m\}} q_{t-1-l}^{(0)} + \\
& \sum_{l=1}^m rp_{t,l} \left( \prod_{ii=1}^p f_0(X_{t-ii-l}) \right) L_i(rs_{t,l}^{\{m\}}) q_{t-1-l}^{(0)}, \quad i = 2, \dots, k
\end{aligned} \tag{80}$$

and

$$\begin{aligned}
VS_t^{((-1))} = & \quad rp_{t,m} HB^{k-1} RS_{t,w^*+m}^{(k+1),\{m\}} VS_{t-m}^{((-1))} + rp_{t,m} BHB^{k-2} RS_{t,w^*+m}^{(k+1),\{m\}} vS_{t-m}^{(k)} + \\
& \quad rp_{t,m} B^2 HB^{k-3} RS_{t,w^*+m}^{(k+1),\{m\}} vS_{t-m}^{(k-1)} + \dots + rp_{t,m} B^{k-1} HRS_{t,w^*+m}^{(k+1),\{m\}} vS_{t-m}^{(2)} + \\
& \quad \sum_{j=1}^k \sum_{l=1+m}^{w^*+m-1} rp_{t,l} B^k RS_{t,l}^{(k+1,j),\{m\}} vS_{t-l}^{(j)} + \\
& \quad \sum_{l=1+m}^{w^*+m} rp_{t,l} B^k RS_{t,l}^{(k+1,k+1),\{m\}} VS_{t-l}^{((-1))} + \\
& \quad \sum_{l=1+m}^{w^*+m} rp_{t,l} \left( \prod_{ii=1}^p f_0(X_{t-ii-l}) \right) b^k r s_{t,l}^{(k+1),\{m\}} q_{t-1-l}^{(\mathbf{0})} + \\
& \quad \sum_{l=1}^m rp_{t,l} \left( \prod_{ii=1}^p f_0(X_{t-ii-l}) \right) L_{k+1}(r s_{t,l}^{\{m\}}) q_{t-1-l}^{(\mathbf{0})}
\end{aligned} \tag{81}$$

and

$$\begin{aligned}
\frac{q_{t-1}^{(\mathbf{0})}}{\pi_0} = & \quad rp_{t,m} HB^{k-1} RQ_{t,w^*+m}^{\{m\}} VS_{t-m}^{((-1))} + rp_{t,m} BHB^{k-2} RQ_{t,w^*+m}^{\{m\}} vS_{t-m}^{(k)} + \\
& \quad rp_{t,m} B^2 HB^{k-3} RQ_{t,w^*+m}^{\{m\}} vS_{t-m}^{(k-1)} + \dots + rp_{t,m} B^{k-1} HRQ_{t,w^*+m}^{\{m\}} vS_{t-m}^{(2)} + \\
& \quad \sum_{j=1}^k \sum_{l=1+m}^{w^*+m-1} rp_{t,l} B^k RQ_{t,l}^{(j),\{m\}} vS_{t-l}^{(j)} + \sum_{l=1+m}^{w^*+m} rp_{t,l} B^k RQ_{t,l}^{(k+1),\{m\}} VS_{t-l}^{((-1))} + \\
& \quad \sum_{l=1+m}^{w^*+m} rp_{t,l} \left( \prod_{ii=1}^p f_0(X_{t-ii-l}) \right) b^k r q_{t,l}^{\{m\}} q_{t-1-l}^{(\mathbf{0})} + \\
& \quad \sum_{l=1}^m rp_{t,l} \left( \prod_{ii=1}^p f_0(X_{t-ii-l}) \right) r q_{t,l}^{\{m\}} q_{t-1-l}^{(\mathbf{0})};
\end{aligned} \tag{82}$$

in all (80), (81) and (82),  $vS_{t-m}^{(1)}$  is not present.

$< n = 1 >$ : consider (80) and (81) for  $m = 1$  only and then  $vS_{t-w^*}^{(1)}$  is solved from the equation for  $vS_t^{(2)}$  ( $m = 1$ ); the result is plugged in  $vS_t^{(i)}$ ,  $i = 3, \dots, k$  and  $VS_t^{((-1))}$  ( $m = 1$ ) yielding (66) and (67), (68), (69), (70), (71) when  $r = 1$  (and  $n = 1$ ); from the newly derived results,  $vS_{t-w^*}^{(2)}$  is solved from the equation for  $vS_t^{(3)}$  and the result is plugged in (the newly derived)  $vS_t^{(i)}$ ,  $i = 4, \dots, k$  and  $VS_t^{((-1))}$  yielding (72) and (73), (74), (75), (76), (77) when

$r = 1$ ,  $i_* - r = 1$  (and  $n = 1$ ). This goes on until

$$\begin{aligned}
vS_{t-w^*}^{(k)} = & \{rp_{t,w^*}\}^{-1} \{C^{k-1} B^k RS_{t,w^*}^{(k+1,k)}\}^{-1} \left\{ VS_t^{((-1))} - IC^{k-2} B^k RS_{t,w^*}^{(k+1)} vS_t^{(k)} - \right. \\
& CIC^{k-3} B^k RS_{t,w^*}^{(k+1)} vS_t^{(k-1)} - \dots - C^{k-2} IB^k RS_{t,w^*}^{(k+1)} vS_t^{(2)} - \\
& rp_{t,1} C^{k-1} HB^{k-1} RS_{t,w^*+1}^{(k+1)} VS_{t-1}^{((-1))} - \dots - rp_{t,1} C^{k-1} B^{k-1} HRS_{t,w^*+1}^{(k+1)} vS_{t-1}^{(2)} - \\
& \sum_{j=1}^k \sum_{l=2}^{w^*-1} rp_{t,l} C^{k-1} B^k RS_{t,l}^{(k+1,j)} vS_{t-l}^{(j)} - \\
& \sum_{l=2}^{w^*+1} rp_{t,l} C^{k-1} B^k RS_{t,l}^{(k+1,k+1)} VS_{t-l}^{((-1))} - \\
& \sum_{l=2}^{w^*+1} rp_{t,l} \left( \prod_{ii=1}^p f_0(X_{t-ii-l}) \right) c^{k-1} b^k rs_{t,l}^{(k+1)} q_{t-1-l}^{(0)} - \\
& \left. rp_{t,1} \left( \prod_{ii=1}^p f_0(X_{t-ii-1}) \right) c^{k-1} rs_{t,1}^{(k+1),\{1\}} q_{t-1-1}^{(0)} \right\}
\end{aligned}$$

is the last one solved from  $VS_t^{((-1))}$ .

Next for  $m = 2, 3, \dots$ , start from the equations (80), (81) and (82) as they were obtained in  $< n = 0 >$  and repeat a similar process:  $vS_{t-m+1-w^*}^{(1)}$  (this is the  $vS_{t-w^*}^{(1)}$  that was solved already but for  $t = t - m + 1$ ) is plugged in those versions yielding (36), (37) and (38), (40), (42), (44), (46), (48), (39), (41), (43), (45), (47), (49) when  $r = 1$  (and  $n = 1$ ); next, in these versions of  $vS_t^{(i)}$ ,  $VS_t^{((-1))}$  and  $\{q_{t-1}^{\{0\}}/\pi_0\}$  that were just computed,  $vS_{t-m+1-w^*}^{(2)}$  (i.e. the  $vS_{t-w^*}^{(2)}$  from before but for  $t = t - m + 1$ ) is plugged in, yielding (50) and (51) and (52), (54), (56), (58), (60), (62), (64), (53), (55), (57), (59), (61), (63), (65) when  $r = 1$ ,  $i_* - r = 1$  (and  $n = 1$ ). This goes on ( $i_* = r + 2, \dots, k$ ) until it will be written in the end, that

$$\begin{aligned}
vS_t^{(i)} = & rp_{t,m-1} HB^{2k-1} RS_{t,w^*+m-1}^{(i),\{m\}} VS_{t-m+1}^{((-1))} + \\
& rp_{t,m-1} BHB^{2k-2} RS_{t,w^*+m-1}^{(i),\{m\}} vS_{t-m+1}^{(k)} + \dots + \\
& rp_{t,m-1} B^{k-1} HB^k RS_{t,w^*+m-1}^{(i),\{m\}} vS_{t-m+1}^{(2)} + rp_{t,m} B^k HB^{k-1} RS_{t,w^*+m}^{(i),\{m\}} VS_{t-m}^{((-1))} + \\
& \dots + rp_{t,m} B^{2k-1} HRS_{t,w^*+m}^{(i),\{m\}} vS_{t-m}^{(2)} + \sum_{j=1}^k \sum_{l=1+m}^{w^*+m-2} rp_{t,l} B^{2k} RS_{t,l}^{(i,j),\{m\}} vS_{t-l}^{(j)} + \\
& \sum_{l=1+m}^{w^*+m} rp_{t,l} B^{2k} RS_{t,l}^{(i,k+1),\{m\}} VS_{t-l}^{((-1))} + \\
& \sum_{l=1+m}^{w^*+m} rp_{t,l} \left( \prod_{ii=1}^p f_0(X_{t-ii-l}) \right) b^{2k} rs_{t,l}^{(i),\{m\}} q_{t-1-l}^{(0)} + \\
& rp_{t,m} \left( \prod_{ii=1}^p f_0(X_{t-ii-m}) \right) b^k rs_{t,m}^{(i),\{m\},\{1\}} q_{t-1-m}^{(0)} + \\
& \sum_{l=1}^{m-1} rp_{t,l} \left( \prod_{ii=1}^p f_0(X_{t-ii-l}) \right) L_i(rs_{t,l}^{\{m\}}) q_{t-1-l}^{(0)}, \quad i = 2, \dots, k
\end{aligned} \tag{83}$$



and

$$\begin{aligned}
VS_t^{((-1))} = & \quad rp_{t,m-1} HB^{2k-1} RS_{t,w^*+m-1}^{(k+1),\{m\}} VS_{t-m+1}^{((-1))} + \\
& \quad rp_{t,m-1} BHB^{2k-2} RS_{t,w^*+m-1}^{(k+1),\{m\}} vS_{t-m+1}^{(k)} + \dots + \\
& \quad rp_{t,m-1} B^{k-1} HB^k RS_{t,w^*+m-1}^{(k+1),\{m\}} vS_{t-m+1}^{(2)} + rp_{t,m} B^k HB^{k-1} RS_{t,w^*+m}^{(k+1),\{m\}} VS_{t-m}^{((-1))} + \\
& \quad \dots + rp_{t,m} B^{2k-1} HRS_{t,w^*+m}^{(k+1),\{m\}} vS_{t-m}^{(2)} + \sum_{j=1}^k \sum_{l=1+m}^{w^*+m-2} rp_{t,l} B^{2k} RS_{t,l}^{(k+1,j),\{m\}} vS_{t-l}^{(j)} + \\
& \quad \sum_{l=1+m}^{w^*+m} rp_{t,l} B^{2k} RS_{t,l}^{(k+1,k+1),\{m\}} VS_{t-l}^{((-1))} + \\
& \quad \sum_{l=1+m}^{w^*+m} rp_{t,l} \left( \prod_{ii=1}^p f_0(X_{t-ii-l}) \right) b^{2k} rs_{t,l}^{(k+1),\{m\}} q_{t-1-l}^{(0)} + \\
& \quad rp_{t,m} \left( \prod_{ii=1}^p f_0(X_{t-ii-m}) \right) b^k rs_{t,m}^{(k+1),(\{m\},\{1\})} q_{t-1-m}^{(0)} + \\
& \quad \sum_{l=1}^{m-1} rp_{t,l} \left( \prod_{ii=1}^p f_0(X_{t-ii-l}) \right) L_{k+1}(rs_{t,l}^{\{m\}}) q_{t-1-l}^{(0)} \tag{84}
\end{aligned}$$

and

$$\begin{aligned}
\frac{q_{t-1}^{(0)}}{\pi_0} = & \quad rp_{t,m-1} HB^{2k-1} RQ_{t,w^*+m-1}^{\{m\}} VS_{t-m+1}^{((-1))} + \\
& \quad rp_{t,m-1} BHB^{2k-2} RQ_{t,w^*+m-1}^{\{m\}} vS_{t-m+1}^{(k)} + \dots + \\
& \quad rp_{t,m-1} B^{k-1} HB^k RQ_{t,w^*+m-1}^{\{m\}} vS_{t-m+1}^{(2)} + rp_{t,m} B^k HB^{k-1} RQ_{t,w^*+m}^{\{m\}} VS_{t-m}^{((-1))} + \\
& \quad \dots + rp_{t,m} B^{2k-1} HRQ_{t,w^*+m}^{\{m\}} vS_{t-m}^{(2)} + \sum_{j=1}^k \sum_{l=1+m}^{w^*+m-2} rp_{t,l} B^{2k} RQ_{t,l}^{(j),\{m\}} vS_{t-l}^{(j)} + \\
& \quad \sum_{l=1+m}^{w^*+m} rp_{t,l} B^{2k} RQ_{t,l}^{(k+1),\{m\}} VS_{t-l}^{((-1))} + \\
& \quad \sum_{l=1+m}^{w^*+m} rp_{t,l} \left( \prod_{ii=1}^p f_0(X_{t-ii-l}) \right) b^{2k} rq_{t,l}^{\{m\}} q_{t-1-l}^{(0)} + \\
& \quad rp_{t,m} \left( \prod_{ii=1}^p f_0(X_{t-ii-m}) \right) b^k rq_{t,m}^{(\{m\},\{1\})} q_{t-1-m}^{(0)} + \\
& \quad \sum_{l=1}^{m-1} rp_{t,l} \left( \prod_{ii=1}^p f_0(X_{t-ii-l}) \right) rq_{t,l}^{\{m\}} q_{t-1-l}^{(0)}; \tag{85}
\end{aligned}$$

in all (83), (84) and (85),  $vS_{t-m+1}^{(1)}$  and  $vS_{t-m}^{(1)}$  are not present;

⋮

How this patent continues should be obvious by now. It may be accepted in  $< n = \nu >$  (where  $\nu = 2, \dots, w^* - 2$ ) and for any  $m = \nu + 1, \nu + 2, \dots$ , that  $vS_t^{(i)}$ ,  $VS_t^{((-1))}$  and  $\{q_{t-1}^{(0)}/\pi_0\}$  have a certain form, in which  $vS_{t-m+\nu}^{(1)}, \dots, vS_{t-m}^{(1)}$  are not present. Moving to step  $< n = \nu + 1 >$ ,

$vS_{t-w^*}^{(1)}$  will be solved from  $m = \nu + 1$  (last version of  $< n = \nu >$ ) and  $i = 2$  and this will be plugged in  $i = 3, \dots, k + 1$  (still  $m = \nu + 1$  and last versions of  $< n = \nu >$ );  $vS_{t-w^*}^{(2)}$  will be solved from the version that has just been derived when  $i = 3$  and this will be plugged in (the just derived versions for)  $i = 4, \dots, k + 1$  ( $m = \nu + 1$ );...; by the end of this  $vS_{t-w^*}^{(k)}$  will have been solved (from the last derived version of  $i = k + 1$ , i.e.  $VS_t^{((-1))}$ ).

Still within the  $< n = \nu + 1 >$  loop,  $vS_{t-m+\nu+1-w^*}^{(1)}$  (i.e.  $vS_{t-w^*}^{(1)}$  as it was last computed and for  $t = t - m + \nu + 1$ ) is plugged in  $vS_t^{(i)}$ ,  $i = 2, \dots, k$ ,  $VS_t^{((-1))}$ ,  $\{q_{t-1}^{(0)}/\pi_0\}$ ,  $m = \nu + 2, \dots$  (last version of  $< n = \nu >$ ); next,  $vS_{t-m+\nu+1-w^*}^{(2)}$  (again this is from  $vS_{t-w^*}^{(2)}$  as it was computed and for  $t = t - m + \nu + 1$ ) is plugged in the just derived versions  $vS_t^{(i)}$ ,  $i = 2, \dots, k$ ,  $VS_t^{((-1))}$ ,  $\{q_{t-1}^{(0)}/\pi_0\}$ ,  $m = \nu + 2, \dots$ ; and so on ..., until the last inclusion when  $vS_t^{(i)}$ ,  $i = 2, \dots, k$ ,  $VS_t^{((-1))}$  and  $\{q_{t-1}^{(0)}/\pi_0\}$ ,  $m = \nu + 2, \dots$  are free of  $vS_{t-m+\nu+1}^{(1)}, \dots, vS_{t-m}^{(1)}$ .

Hence the induction argument on  $n$  when  $r = 1$ , has been completed. Especially in the end,  $n = w^* - 1$  and  $m = w^*, w^* + 1, \dots$ , it will be written that

$$\begin{aligned}
vS_t^{(i)} &= rp_{t,m-w^*+1} HB^{w^*k-1} RS_{t,m+1}^{(i),\{m\}} VS_{t-m+w^*-1}^{((-1))} + \dots + \\
&\quad rp_{t,m-w^*+1} B^{k-1} HB^{(w^*-1)k} RS_{t,m+1}^{(i),\{m\}} vS_{t-m+w^*-1}^{(2)} + \\
&\quad rp_{t,m-w^*+2} B^k HB^{(w^*-1)k-1} RS_{t,m+2}^{(i),\{m\}} VS_{t-m+w^*-2}^{((-1))} + \dots + \\
&\quad rp_{t,m-w^*+2} B^{2k-1} HB^{(w^*-2)k} RS_{t,m+2}^{(i),\{m\}} vS_{t-m+w^*-2}^{(2)} + \dots \dots + \\
&\quad rp_{t,m} B^{(w^*-1)k} HB^{k-1} RS_{t,w^*+m}^{(i),\{m\}} VS_{t-m}^{((-1))} + \dots + \\
&\quad rp_{t,m} B^{w^*k-1} HRS_{t,w^*+m}^{(i),\{m\}} vS_{t-m}^{(2)} + \sum_{l=1+m}^{w^*+m} rp_{t,l} B^{w^*k} RS_{t,l}^{(i,k+1),\{m\}} VS_{t-l}^{((-1))} + \\
\sum_{l=1+m}^{w^*+m} rp_{t,l} \left( \prod_{ii=1}^p f_0(X_{t-ii-l}) \right) b^{w^*k} r_{s_{t,l}}^{(i),\{m\}} q_{t-1-l}^{(0)} + \\
rp_{t,m} \left( \prod_{ii=1}^p f_0(X_{t-ii-m}) \right) b^{(w^*-1)k} r_{s_{t,m}}^{(i),\{m\},\{w^*-1\}} q_{t-1-m}^{(0)} + \dots \dots + \\
rp_{t,m-w^*+2} \left( \prod_{ii=1}^p f_0(X_{t-ii-m+w^*-2}) \right) b^k r_{s_{t,m-w^*+2}}^{(i),\{m\},\{w^*-1\}} q_{t-1-m+w^*-2}^{(0)} + \\
\sum_{l=1}^{m-w^*+1} rp_{t,l} \left( \prod_{ii=1}^p f_0(X_{t-ii-l}) \right) L_i(r_{s_{t,l}}^{\{m\}}) q_{t-1-l}^{(0)}, \quad i = 2, \dots, k \tag{86}
\end{aligned}$$

and that

$$\begin{aligned}
VS_t^{((-1))} = & \quad rp_{t,m-w^*+1} HB^{w^*k-1} RS_{t,m+1}^{(k+1),\{m\}} VS_{t-m+w^*-1}^{((-1))} + \dots + \\
& \quad rp_{t,m-w^*+1} B^{k-1} HB^{(w^*-1)k} RS_{t,m+1}^{(k+1),\{m\}} vS_{t-m+w^*-1}^{(2)} + \\
& \quad \quad rp_{t,m-w^*+2} B^k HB^{(w^*-1)k-1} RS_{t,m+2}^{(k+1),\{m\}} VS_{t-m+w^*-2}^{((-1))} + \dots + \\
& \quad \quad rp_{t,m-w^*+2} B^{2k-1} HB^{(w^*-2)k} RS_{t,m+2}^{(k+1),\{m\}} vS_{t-m+w^*-2}^{(2)} + \dots \quad \dots + \\
& \quad \quad rp_{t,m} B^{(w^*-1)k} HB^{k-1} RS_{t,w^*+m}^{(k+1),\{m\}} VS_{t-m}^{((-1))} + \dots + \\
& \quad \quad rp_{t,m} B^{w^*k-1} HRS_{t,w^*+m}^{(k+1),\{m\}} vS_{t-m}^{(2)} + \sum_{l=1+m}^{w^*+m} rp_{t,l} B^{w^*k} RS_{t,l}^{(k+1),\{m\}} VS_{t-l}^{((-1))} + \\
& \quad \quad \sum_{l=1+m}^{w^*+m} rp_{t,l} \left( \prod_{ii=1}^p f_0(X_{t-ii-l}) \right) b^{w^*k} rS_{t,l}^{(k+1),\{m\}} q_{t-1-l}^{(0)} + \\
& \quad \quad rp_{t,m} \left( \prod_{ii=1}^p f_0(X_{t-ii-m}) \right) b^{(w^*-1)k} rS_{t,m}^{(k+1),(\{m\},\{w^*-1\})} q_{t-1-m}^{(0)} + \dots \quad \dots + \\
& \quad \quad rp_{t,m-w^*+2} \left( \prod_{ii=1}^p f_0(X_{t-ii-m+w^*-2}) \right) b^k rS_{t,m-w^*+2}^{(k+1),(\{m\},\{w^*-1\})} q_{t-1-m+w^*-2}^{(0)} + \\
& \quad \quad \sum_{l=1}^{m-w^*+1} rp_{t,l} \left( \prod_{ii=1}^p f_0(X_{t-ii-l}) \right) L_{k+1}(rS_{t,l}^{\{m\}}) q_{t-1-l}^{(0)} \tag{87}
\end{aligned}$$

and that

$$\begin{aligned}
\frac{q_{t-1}^{(0)}}{\pi_0} = & \quad rp_{t,m-w^*+1} HB^{w^*k-1} RQ_{t,m+1}^{\{m\}} VS_{t-m+w^*-1}^{((-1))} + \dots + \\
& \quad rp_{t,m-w^*+1} B^{k-1} HB^{(w^*-1)k} RQ_{t,m+1}^{\{m\}} vS_{t-m+w^*-1}^{(2)} + \\
& \quad \quad rp_{t,m-w^*+2} B^k HB^{(w^*-1)k-1} RQ_{t,m+2}^{\{m\}} VS_{t-m+w^*-2}^{((-1))} + \dots + \\
& \quad \quad rp_{t,m-w^*+2} B^{2k-1} HB^{(w^*-2)k} RQ_{t,m+2}^{\{m\}} vS_{t-m+w^*-2}^{(2)} + \dots \quad \dots + \\
& \quad \quad rp_{t,m} B^{(w^*-1)k} HB^{k-1} RQ_{t,w^*+m}^{\{m\}} VS_{t-m}^{((-1))} + \dots + \\
& \quad \quad rp_{t,m} B^{w^*k-1} HRQ_{t,w^*+m}^{\{m\}} vS_{t-m}^{(2)} + \sum_{l=1+m}^{w^*+m} rp_{t,l} B^{w^*k} RQ_{t,l}^{(k+1),\{m\}} VS_{t-l}^{((-1))} + \\
& \quad \quad \sum_{l=1+m}^{w^*+m} rp_{t,l} \left( \prod_{ii=1}^p f_0(X_{t-ii-l}) \right) b^{w^*k} rQ_{t,l}^{\{m\}} q_{t-1-l}^{(0)} + \\
& \quad \quad rp_{t,m} \left( \prod_{ii=1}^p f_0(X_{t-ii-m}) \right) b^{(w^*-1)k} rQ_{t,m}^{\{m\},\{w^*-1\}} q_{t-1-m}^{(0)} + \dots \quad \dots + \\
& \quad \quad rp_{t,m-w^*+2} \left( \prod_{ii=1}^p f_0(X_{t-ii-m+w^*-2}) \right) b^k rQ_{t,m-w^*+2}^{\{m\},\{w^*-1\}} q_{t-1-m+w^*-2}^{(0)} + \\
& \quad \quad \sum_{l=1}^{m-w^*+1} rp_{t,l} \left( \prod_{ii=1}^p f_0(X_{t-ii-l}) \right) rQ_{t,l}^{\{m\}} q_{t-1-l}^{(0)}, \tag{88}
\end{aligned}$$

such that all (86), (87) and (88) do not use  $vS_{t-l}^{(1)}$ ,  $l > 0$  at all.

The cases up to  $m = w^*$  will be of use only; this concludes the induction argument on  $n$ , but

continues with the case ( $r = 1$ ). Move from the ‘basic step’ to the ‘ $r$ -step’ of the proposition.

The equations (86) and (87),  $m = w^*$  are put together for  $i = 2, \dots, k$  and  $i = k + 1$ , respectively, writing

$$\begin{aligned} \begin{bmatrix} vS_t^{(2)} \\ \vdots \\ vS_t^{(k)} \\ VS_t^{((-1))} \end{bmatrix} &= \sum_{l=1}^{w^*} rp_{t,l} R^2 S_{t,l} \begin{bmatrix} vS_{t-l}^{(2)} \\ \vdots \\ vS_{t-l}^{(k)} \\ VS_{t-l}^{((-1))} \end{bmatrix} + \sum_{l=1+w^*}^{2w^*} rp_{t,l} ORS_{t,l} VS_{t-l}^{((-1))} + \\ &\sum_{l=1}^{2w^*} rp_{t,l} \left( \prod_{ii=1}^p f_0(X_{t-ii-l}) \right) r^2 s_{t,l} q_{t-1-l}^{(0)}, \end{aligned} \quad (89)$$

which yields (9), (10) and (11). Similarly, it can be written from (88),  $m = w^*$ , that

$$\begin{aligned} \frac{q_{t-1}^{(0)}}{\pi_0} &= \sum_{l=1}^{w^*} rp_{t,l} R^2 Q_{t,l} \begin{bmatrix} vS_{t-l}^{(2)} \\ \vdots \\ vS_{t-l}^{(k)} \\ VS_{t-l}^{((-1))} \end{bmatrix} + \sum_{l=1+w^*}^{2w^*} rp_{t,l} ORQ_{t,l} VS_{t-l}^{((-1))} + \\ &\sum_{l=1}^{2w^*} rp_{t,l} \left( \prod_{ii=1}^p f_0(X_{t-ii-l}) \right) r^2 q_{t,l} q_{t-1-l}^{(0)}, \end{aligned} \quad (90)$$

yielding (12), (13) and (14).

Move from the ‘ $r$ -step’ back to the ‘ $m$ -step’.

It should be obvious how substitution of  $[vS_{t-1}^{(2)} \dots vS_{t-1}^{(k)} VS_{t-1}^{((-1))}]^\tau$  in both (89) and (90), followed by substitution of  $[vS_{t-2}^{(2)} \dots vS_{t-2}^{(k)} VS_{t-2}^{((-1))}]^\tau$  in both newly derived versions e.t.c., yields (2), (3) and (4), together with (6), (7) and (8).

Then for any  $m \in \mathbb{N}$  (or  $m = 0$  can be included before substitution as well), it can be deduced that

$$\begin{aligned} vS_t^{(i)} &= \sum_{j=2}^k \sum_{l=1+m}^{w^*+m} rp_{t,l} L_{i-1,j-1}(R^2 S_{t,l}^{\{m\}}) vS_{t-l}^{(j)} + \sum_{l=1+m}^{w^*+m} rp_{t,l} L_{i-1,k}(R^2 S_{t,l}^{\{m\}}) VS_{t-l}^{((-1))} \\ &+ \sum_{l=w^*+m+1}^{2w^*+m} rp_{t,l} L_{i-1,1}(ORS_{t,l}^{\{m\}}) VS_{t-l}^{((-1))} \\ &+ \sum_{l=1}^{2w^*+m} rp_{t,l} \left( \prod_{ii=1}^p f_0(X_{t-ii-l}) \right) L_{i-1}(r^2 s_{t,l}^{\{m\}}) q_{t-1-l}^{(0)}, \quad i = 2, \dots, k, \end{aligned}$$

and

$$\begin{aligned}
VS_t^{((-1))} &= \sum_{j=2}^k \sum_{l=1+m}^{w^*+m} rp_{t,l} L_{k,j-1}(R^2 S_{t,l}^{\{m\}}) vS_{t-l}^{(j)} + \sum_{l=1+m}^{w^*+m} rp_{t,l} L_{k,k}(R^2 S_{t,l}^{\{m\}}) VS_{t-l}^{((-1))} \\
&+ \sum_{l=w^*+m+1}^{2w^*+m} rp_{t,l} L_{k,1}(ORS_{t,l}^{\{m\}}) VS_{t-l}^{((-1))} \\
&+ \sum_{l=1}^{2w^*+m} rp_{t,l} \left( \prod_{ii=1}^p f_0(X_{t-ii-l}) \right) L_k(r^2 s_{t,l}^{\{m\}}) q_{t-1-l}^{(0)}
\end{aligned}$$

and that

$$\begin{aligned}
\frac{q_{t-1}^{(0)}}{\pi_0} &= \sum_{j=2}^k \sum_{l=1+m}^{w^*+m} rp_{t,l} L_{j-1}(R^2 Q_{t,l}^{\{m\}}) vS_{t-l}^{(j)} + \sum_{l=1+m}^{w^*+m} rp_{t,l} L_k(R^2 Q_{t,l}^{\{m\}}) VS_{t-l}^{((-1))} \\
&+ \sum_{l=w^*+m+1}^{2w^*+m} rp_{t,l} ORQ_{t,l}^{\{m\}} VS_{t-l}^{((-1))} \\
&+ \sum_{l=1}^{2w^*+m} rp_{t,l} \left( \prod_{ii=1}^p f_0(X_{t-ii-l}) \right) r^2 q_{t,l}^{\{m\}} q_{t-1-l}^{(0)}.
\end{aligned}$$

The argument ( $r = 1$ ) is completed here.

$\vdots$

( $r = \rho$ ) (where it might be  $\rho = 2, \dots, k-1$ ):

After the necessary steps have been taken, it is accepted for  $m \in \mathbb{N}_0$  that

$$\begin{aligned}
vS_t^{(i)} &= \sum_{j=\rho+1}^k \sum_{l=1+m}^{w^*+m} rp_{t,l} L_{i-\rho,j-\rho}(R^{\rho+1} S_{t,l}^{\{m\}}) vS_{t-l}^{(j)} + \\
&\sum_{l=1+m}^{w^*+m} rp_{t,l} L_{i-\rho,k+1-\rho}(R^{\rho+1} S_{t,l}^{\{m\}}) VS_{t-l}^{((-1))} + \sum_{l=w^*+m+1}^{(\rho+1)w^*+m} rp_{t,l} L_{i-\rho,1}(OR^\rho S_{t,l}^{\{m\}}) VS_{t-l}^{((-1))} + \\
&\sum_{l=1}^{(\rho+1)w^*+m} rp_{t,l} \left( \prod_{ii=1}^p f_0(X_{t-ii-l}) \right) L_{i-\rho}(r^{\rho+1} s_{t,l}^{\{m\}}) q_{t-1-l}^{(0)}, \quad i = \rho+1, \dots, k
\end{aligned}$$

and that

$$\begin{aligned}
VS_t^{((-1))} &= \sum_{j=\rho+1}^k \sum_{l=1+m}^{w^*+m} rp_{t,l} L_{k+1-\rho,j-\rho}(R^{\rho+1} S_{t,l}^{\{m\}}) vS_{t-l}^{(j)} + \\
&\sum_{l=1+m}^{w^*+m} rp_{t,l} L_{k+1-\rho,k+1-\rho}(R^{\rho+1} S_{t,l}^{\{m\}}) VS_{t-l}^{((-1))} + \sum_{l=w^*+m+1}^{(\rho+1)w^*+m} rp_{t,l} L_{k+1-\rho,1}(OR^\rho S_{t,l}^{\{m\}}) VS_{t-l}^{((-1))} + \\
&\sum_{l=1}^{(\rho+1)w^*+m} rp_{t,l} \left( \prod_{ii=1}^p f_0(X_{t-ii-l}) \right) L_{k+1-\rho}(r^{\rho+1} s_{t,l}^{\{m\}}) q_{t-1-l}^{(0)}
\end{aligned}$$

and

$$\begin{aligned} \frac{q_{t-1}^{(0)}}{\pi_0} &= \sum_{j=\rho+1}^k \sum_{l=1+m}^{w^*+m} r p_{t,l} L_{j-\rho}(R^{\rho+1} Q_{t,l}^{\{m\}}) v S_{t-l}^{(j)} + \sum_{l=1+m}^{w^*+m} r p_{t,l} L_{k+1-\rho}(R^{\rho+1} Q_{t,l}^{\{m\}}) V S_{t-l}^{((-1))} \\ &+ \sum_{l=w^*+m+1}^{(\rho+1)w^*+m} r p_{t,l} O R^{\rho} Q_{t,l}^{\{m\}} V S_{t-l}^{((-1))} + \sum_{l=1}^{(\rho+1)w^*+m} r p_{t,l} \left( \prod_{ii=1}^p f_0(X_{t-ii-l}) \right) r^{\rho+1} q_{t,l}^{\{m\}} q_{t-1-l}^{(0)}. \end{aligned}$$

( $r = \rho + 1$ ): formally a new induction argument on  $n$  is required, but this will be done very quickly as it resembles the case presented already ( $r = 1$ );

$< n = 0 >$ : solve  $v S_{t-w^*}^{(\rho+1)}$  from the accepted version when  $m = 0$ ,  $i = \rho + 2$ ; plug the solution in the other accepted versions  $m = 0$ ,  $i = \rho + 3, \dots, k + 1$ , yielding the same equations (29) and (30), (31) but for  $r = \rho + 1$ , as well as

$$C O R^{\rho} S_{t,l}^{(i)} := L_{i-\rho,1}(O R^{\rho} S_{t,l}) - I R^{\rho+1} S_{t,w^*}^{(i)} \cdot L_{2,1}(O R^{\rho} S_{t,l});$$

from the just derived results, solve  $v S_{t-w^*}^{(\rho+2)}$  from  $i = \rho + 3$  and plug the solution in the other just derived results  $i = \rho + 4, \dots, k + 1$ , yielding the same equations (32) and (33), (34), (35) but for  $r = \rho + 1$ ,  $i_* - r = 1$ . In fact by going on for all  $i_* = \rho + 2, \dots, k$ , it will be added that

$$C^{i_*-\rho} O R^{\rho} S_{t,l}^{(i)} := C^{i_*-\rho-1} O R^{\rho} S_{t,l}^{(i)} - I C^{i_*-\rho-1} R^{\rho+1} S_{t,w^*}^{(i)} \cdot C^{i_*-\rho-1} O R^{\rho} S_{t,l}^{(i_*+1)};$$

$v S_{t-w^*}^{(k)}$  will be the last to solve (from  $V S_t^{((-1))}$ ).

Back to the accepted versions from ( $r = \rho$ ),  $m \in \mathbb{N}$  for  $v S_t^{(i)}$ ,  $i = \rho + 1, \dots, k$ ,  $V S_t^{((-1))}$  and  $\{q_{t-1}^{(0)}/\pi_0\}$ , plug in those the quantity  $v S_{t-m-w^*}^{(\rho+1)}$  yielding (15), (16) and (17), (19), (18), (20) when  $r = \rho + 1$ , as well as

$$\begin{aligned} B O R^{\rho} S_{t,l}^{(i),\{m\}} &:= L_{i-\rho,1}(O R^{\rho} S_{t,l}^{\{m\}}) - H R^{\rho+1} S_{t,w^*+m}^{(i),\{m\}} \cdot L_{2,1}(O R^{\rho} S_{t-m,l-m}), \\ B O R^{\rho} Q_{t,l}^{\{m\}} &:= O R^{\rho} Q_{t,l}^{\{m\}} - H R^{\rho+1} Q_{t,w^*+m}^{\{m\}} \cdot L_{2,1}(O R^{\rho} S_{t-m,l-m}); \end{aligned}$$

next, in those versions of  $v S_t^{(i)}$ ,  $V S_t^{((-1))}$ ,  $\{q_{t-1}^{(0)}/\pi_0\}$  that were just computed,  $v S_{t-m-w^*}^{(\rho+2)}$  is plugged in yielding (21), (22) and (23), (25), (27), (24), (26), (28) when  $r = \rho + 1$ ,  $i_* - r = 1$ , as well as

$$\begin{aligned} B^2 O R^{\rho} S_{t,l}^{(i),\{m\}} &:= B O R^{\rho} S_{t,l}^{(i),\{m\}} - H B R^{\rho+1} S_{t,w^*+m}^{(i),\{m\}} \cdot C O R^{\rho} S_{t-m,l-m}^{(\rho+3)}, \\ B^2 O R^{\rho} Q_{t,l}^{\{m\}} &:= B O R^{\rho} Q_{t,l}^{\{m\}} - H B R^{\rho+1} Q_{t,w^*+m}^{\{m\}} \cdot C O R^{\rho} S_{t-m,l-m}^{(\rho+3)}. \end{aligned}$$

This goes on for  $i_* = (\rho + 1) + 2, \dots, k$  by plugging in consecutively the quantity from before and, besides the other forms that have been seen already, there will be

$$\begin{aligned} B^{i_*-\rho} O R^{\rho} S_{t,l}^{(i),\{m\}} &:= B^{i_*-\rho-1} O R^{\rho} S_{t,l}^{(i),\{m\}} - H B^{i_*-\rho-1} R^{\rho+1} S_{t,w^*+m}^{(i),\{m\}} \cdot C^{i_*-\rho-1} O R^{\rho} S_{t-m,l-m}^{(i_*+1)}, \\ B^{i_*-\rho} O R^{\rho} Q_{t,l}^{\{m\}} &:= B^{i_*-\rho-1} O R^{\rho} Q_{t,l}^{\{m\}} - H B^{i_*-\rho-1} R^{\rho+1} Q_{t,w^*+m}^{\{m\}} \cdot C^{i_*-\rho-1} O R^{\rho} S_{t-m,l-m}^{(i_*+1)}. \end{aligned}$$

Especially after the last inclusion, the equations of interest become

$$\begin{aligned}
vS_t^{(i)} &= rp_{t,m} HB^{k-\rho-1} R^{\rho+1} S_{t,w^*+m}^{(i),\{m\}} VS_{t-m}^{((-1))} + rp_{t,m} BHB^{k-\rho-2} R^{\rho+1} S_{t,w^*+m}^{(i),\{m\}} vS_{t-m}^{(k)} + \\
&\dots + rp_{t,m} B^{k-\rho-1} HR^{\rho+1} S_{t,w^*+m}^{(i),\{m\}} vS_{t-m}^{(\rho+2)} + \sum_{j=\rho+1}^k \sum_{l=1+m}^{w^*+m-1} rp_{t,l} B^{k-\rho} HR^{\rho+1} S_{t,l}^{(i,j),\{m\}} vS_{t-l}^{(j)} + \\
&\sum_{l=1+m}^{w^*+m} rp_{t,l} B^{k-\rho} HR^{\rho+1} S_{t,l}^{(i,k+1),\{m\}} VS_{t-l}^{((-1))} + \sum_{l=w^*+m+1}^{(\rho+1)w^*+m} rp_{t,l} B^{k-\rho} OR^{\rho} S_{t,l}^{(i),\{m\}} VS_{t-l}^{((-1))} + \\
&\sum_{l=1+m}^{(\rho+1)w^*+m} rp_{t,l} \left( \prod_{ii=1}^p f_0(X_{t-ii-l}) \right) b^{k-\rho} r^{\rho+1} s_{t,l}^{(i),\{m\}} q_{t-1-l}^{(0)} + \\
&\sum_{l=1}^m rp_{t,l} \left( \prod_{ii=1}^p f_0(X_{t-ii-l}) \right) L_{i-\rho}(r^{\rho+1} s_{t,l}^{\{m\}}) q_{t-1-l}^{(0)}, \quad i = \rho+2, \dots, k,
\end{aligned}$$

and

$$\begin{aligned}
VS_t^{((-1))} &= rp_{t,m} HB^{k-\rho-1} R^{\rho+1} S_{t,w^*+m}^{(k+1),\{m\}} VS_{t-m}^{((-1))} + rp_{t,m} BHB^{k-\rho-2} R^{\rho+1} S_{t,w^*+m}^{(k+1),\{m\}} vS_{t-m}^{(k)} + \\
&\dots + rp_{t,m} B^{k-\rho-1} HR^{\rho+1} S_{t,w^*+m}^{(k+1),\{m\}} vS_{t-m}^{(\rho+2)} + \sum_{j=\rho+1}^k \sum_{l=1+m}^{w^*+m-1} rp_{t,l} B^{k-\rho} HR^{\rho+1} S_{t,l}^{(k+1,j),\{m\}} vS_{t-l}^{(j)} + \\
&\sum_{l=1+m}^{w^*+m} rp_{t,l} B^{k-\rho} HR^{\rho+1} S_{t,l}^{(k+1,k+1),\{m\}} VS_{t-l}^{((-1))} + \sum_{l=w^*+m+1}^{(\rho+1)w^*+m} rp_{t,l} B^{k-\rho} OR^{\rho} S_{t,l}^{(k+1),\{m\}} VS_{t-l}^{((-1))} + \\
&\sum_{l=1+m}^{(\rho+1)w^*+m} rp_{t,l} \left( \prod_{ii=1}^p f_0(X_{t-ii-l}) \right) b^{k-\rho} r^{\rho+1} s_{t,l}^{(k+1),\{m\}} q_{t-1-l}^{(0)} + \\
&\sum_{l=1}^m rp_{t,l} \left( \prod_{ii=1}^p f_0(X_{t-ii-l}) \right) L_{k+1-\rho}(r^{\rho+1} s_{t,l}^{\{m\}}) q_{t-1-l}^{(0)},
\end{aligned}$$

and

$$\begin{aligned}
\frac{q_{t-1}^{(0)}}{\pi_0} &= rp_{t,m} HB^{k-\rho-1} R^{\rho+1} Q_{t,w^*+m}^{\{m\}} VS_{t-m}^{((-1))} + rp_{t,m} BHB^{k-\rho-2} R^{\rho+1} Q_{t,w^*+m}^{\{m\}} vS_{t-m}^{(k)} + \\
&\dots + rp_{t,m} B^{k-\rho-1} HR^{\rho+1} Q_{t,w^*+m}^{\{m\}} vS_{t-m}^{(\rho+2)} + \sum_{j=\rho+1}^k \sum_{l=1+m}^{w^*+m-1} rp_{t,l} B^{k-\rho} HR^{\rho+1} Q_{t,l}^{(j),\{m\}} vS_{t-l}^{(j)} + \\
&\sum_{l=1+m}^{w^*+m} rp_{t,l} B^{k-\rho} HR^{\rho+1} Q_{t,l}^{(k+1),\{m\}} VS_{t-l}^{((-1))} + \sum_{l=w^*+m+1}^{(\rho+1)w^*+m} rp_{t,l} B^{k-\rho} OR^{\rho} Q_{t,l}^{\{m\}} VS_{t-l}^{((-1))} + \\
&\sum_{l=1+m}^{(\rho+1)w^*+m} rp_{t,l} \left( \prod_{ii=1}^p f_0(X_{t-ii-l}) \right) b^{k-\rho} r^{\rho+1} q_{t,l}^{\{m\}} q_{t-1-l}^{(0)} + \\
&\sum_{l=1}^m rp_{t,l} \left( \prod_{ii=1}^p f_0(X_{t-ii-l}) \right) r^{\rho+1} q_{t,l}^{\{m\}} q_{t-1-l}^{(0)}
\end{aligned}$$

for any  $m \in \mathbb{N}$ ; those are free of  $vS_{t-m}^{(\rho+1)}$ .

How this argument continues in  $< n = \nu >$  and  $< n = \nu + 1 >$  will not be presented here: the reader should look at the case ( $r = 1$ ) to complete the induction on  $n$ ; once the step  $r = \rho + 1$  has finished, the formulae will be verified to complete the induction on  $r$  as well.

Finally, from the special case  $\rho = k - 1$  of the induction for  $r$  as it has just been proven, the final equations will be of the form

$$\begin{aligned}
VS_t^{((-1))} &= rp_{t,1} HB^{w^*-1} R^k S_{t,w^*+1}^{(k+1),\{w^*\}} VS_{t-1}^{((-1))} + \\
&\quad rp_{t,2} BHB^{w^*-2} R^k S_{t,w^*+2}^{(k+1),\{w^*\}} VS_{t-2}^{((-1))} + \dots + \\
&\quad rp_{t,w^*} B^{w^*-1} HR^k S_{t,2w^*}^{(k+1),\{w^*\}} VS_{t-w^*}^{((-1))} + \\
&\quad \sum_{l=1+w^*}^{2w^*} rp_{t,l} B^{w^*} R^k S_{t,l}^{(k+1,k+1),\{w^*\}} VS_{t-l}^{((-1))} + \\
&\quad \sum_{l=2w^*+1}^{(k+1)w^*} rp_{t,l} B^{w^*} OR^{k-1} S_{t,l}^{(k+1),\{w^*\}} VS_{t-l}^{((-1))} + \\
&\quad \sum_{l=1+w^*}^{(k+1)w^*} rp_{t,l} \left( \prod_{ii=1}^p f_0(X_{t-ii-l}) \right) b^{w^*} r^k s_{t,l}^{(k+1),\{w^*\}} q_{t-1-l}^{(\mathbf{0})} + \\
&\quad rp_{t,w^*} \left( \prod_{ii=1}^p f_0(X_{t-ii-w^*}) \right) b^{w^*-1} r^k s_{t,w^*}^{(k+1),(\{w^*\},\{w^*-1\})} q_{t-1-w^*}^{(\mathbf{0})} + \\
&\quad \vdots \\
&\quad rp_{t,2} \left( \prod_{ii=1}^p f_0(X_{t-ii-2}) \right) br^k s_{t,2}^{(k+1),(\{w^*\},\{w^*-1\})} q_{t-1-2}^{(\mathbf{0})} + \\
&\quad rp_{t,1} \left( \prod_{ii=1}^p f_0(X_{t-ii-1}) \right) L_2(r^k s_{t,1}^{\{w^*\}}) q_{t-1-1}^{(\mathbf{0})}
\end{aligned}$$

and

$$\begin{aligned}
\frac{q_{t-1}^{(\mathbf{0})}}{\pi_0} &= rp_{t,1} HB^{w^*-1} R^k Q_{t,w^*+1}^{\{w^*\}} VS_{t-1}^{((-1))} + \\
&\quad rp_{t,2} BHB^{w^*-2} R^k Q_{t,w^*+2}^{\{w^*\}} VS_{t-2}^{((-1))} + \dots + \\
&\quad rp_{t,w^*} B^{w^*-1} HR^k Q_{t,2w^*}^{\{w^*\}} VS_{t-w^*}^{((-1))} + \\
&\quad \sum_{l=1+w^*}^{2w^*} rp_{t,l} B^{w^*} R^k Q_{t,l}^{(k+1),\{w^*\}} VS_{t-l}^{((-1))} + \\
&\quad \sum_{l=2w^*+1}^{(k+1)w^*} rp_{t,l} B^{w^*} OR^{k-1} Q_{t,l}^{\{w^*\}} VS_{t-l}^{((-1))} + \\
&\quad \sum_{l=1+w^*}^{(k+1)w^*} rp_{t,l} \left( \prod_{ii=1}^p f_0(X_{t-ii-l}) \right) b^{w^*} r^k q_{t,l}^{\{w^*\}} q_{t-1-l}^{(\mathbf{0})} + \\
&\quad rp_{t,w^*} \left( \prod_{ii=1}^p f_0(X_{t-ii-w^*}) \right) b^{w^*-1} r^k q_{t,w^*}^{(\{w^*\},\{w^*-1\})} q_{t-1-w^*}^{(\mathbf{0})} + \dots + \\
&\quad rp_{t,2} \left( \prod_{ii=1}^p f_0(X_{t-ii-2}) \right) br^k q_{t,2}^{(\{w^*\},\{w^*-1\})} q_{t-1-2}^{(\mathbf{0})} + \\
&\quad rp_{t,1} \left( \prod_{ii=1}^p f_0(X_{t-ii-1}) \right) r^k q_{t,1}^{\{w^*\}} q_{t-1-1}^{(\mathbf{0})}.
\end{aligned}$$

Following the two equations above (see that  $(k+1)w^* = (k+1)(k+1)^w = (k+1)^{w+1} \equiv$



$(w+1)^*$ ), the notation can be rearranged to write

$$\begin{aligned} VS_t^{((-1))} &= \sum_{l=1}^{(w+1)^*} rp_{t,l} RS(w+1)_{t,l} VS_{t-l}^{((-1))} + \\ &\quad \sum_{l=1}^{(w+1)^*} rp_{t,l} \left( \prod_{ii=1}^p f_0(X_{t-ii-l}) \right) rs(w+1)_{t,l} q_{t-1-l}^{(0)}, \end{aligned}$$

with

$$RS(w+1)_{t,l} := \begin{cases} B^{l-1} H B^{w^*-l} R^k S_{t,w^*+l}^{(k+1),\{w^*\}}, & \text{if } l = 1, \dots, w^*, \\ B^{w^*} R^k S_{t,l}^{(k+1,k+1),\{w^*\}}, & \text{if } l = 1 + w^*, \dots, 2w^*, \\ B^{w^*} O R^{k-1} S_{t,l}^{(k+1),\{w^*\}}, & \text{if } l = 2w^* + 1, \dots, (w+1)^* \end{cases}$$

and

$$rs(w+1)_{t,l} := \begin{cases} L_2(r^k s_{t,l}^{\{w^*\}}), & \text{if } l = 1, \\ b^{l-1} r^k s_{t,l}^{(k+1),(\{w^*\},\{w^*-1\})}, & \text{if } l = 2, \dots, w^*, \\ b^{w^*} r^k s_{t,l}^{(k+1),\{w^*\}}, & \text{if } l = 1 + w^*, \dots, (w+1)^* \end{cases},$$

as well as

$$\begin{aligned} \frac{q_{t-1}^{(0)}}{\pi_0} &= \sum_{l=1}^{(w+1)^*} rp_{t,l} RQ(w+1)_{t,l} VS_{t-l}^{((-1))} + \\ &\quad \sum_{l=1}^{(w+1)^*} rp_{t,l} \left( \prod_{ii=1}^p f_0(X_{t-ii-l}) \right) rq(w+1)_{t,l} q_{t-1-l}^{(0)}, \end{aligned}$$

with

$$RQ(w+1)_{t,l} := \begin{cases} B^{l-1} H B^{w^*-l} R^k Q_{t,w^*+l}^{\{w^*\}}, & \text{if } l = 1, \dots, w^*, \\ B^{w^*} R^k Q_{t,l}^{(k+1),\{w^*\}}, & \text{if } l = 1 + w^*, \dots, 2w^*, \\ B^{w^*} O R^{k-1} Q_{t,l}^{\{w^*\}}, & \text{if } l = 2w^* + 1, \dots, (w+1)^* \end{cases}$$

and

$$rq(w+1)_{t,l} := \begin{cases} r^k q_{t,l}^{\{w^*\}}, & \text{if } l = 1, \\ b^{l-1} r^k q_{t,l}^{\{w^*\},\{w^*-1\}}, & \text{if } l = 2, \dots, w^*, \\ b^{w^*} r^k q_{t,l}^{\{w^*\}}, & \text{if } l = 1 + w^*, \dots, (w+1)^* \end{cases}.$$

By comparing the four formulae to the ones concluding the statement (a) of the proposition, the proof for the induction argument on  $d$  has been completed.

(b) Straight from (78) and (79), it holds that

$$\begin{aligned} p_t &= \sum_{l=1}^{(k+1)^{q-1}} rp_{t,l} RS(q-1)_{t,l} p_{t-l} \\ &\quad + \sum_{l=1}^{(k+1)^{q-1}} rp_{t,l} \left( \prod_{ii=1}^p f_0(X_{t-ii-l}) \right) rs(q-1)_{t,l} q_{t-1-l}^{(0)} \end{aligned}$$

and

$$\begin{aligned} q_{t-1}^{(0)} &= \pi_0 \left\{ \sum_{l=1}^{(k+1)^{q-1}} rp_{t,l} RQ(q-1)_{t,l} p_{t-l} \right. \\ &\quad \left. + \sum_{l=1}^{(k+1)^{q-1}} rp_{t,l} \left( \prod_{ii=1}^p f_0(X_{t-ii-l}) \right) rq(q-1)_{t,l} q_{t-1-l}^{(0)} \right\}, \end{aligned}$$

respectively, where the scalars  $RS(q-1)_{t,l}$ ,  $rs(q-1)_{t,l}$ ,  $RQ(q-1)_{t,l}$  and  $rq(q-1)_{t,l}$  have been determined in (a); it is written here  $RS'_{t,l}$  and  $rs'_{t,l}$  instead of  $RS(q-1)_{t,l}$  and  $rs(q-1)_{t,l}$ , as well as it is transformed for convenience

$$RQ'_{t,l} := \pi_0 RQ(q-1)_{t,l} \quad \text{and} \quad rq'_{t,l} := \pi_0 rq(q-1)_{t,l},$$

resulting in

$$p_t = \sum_{l=1}^{(k+1)^{q-1}} rp_{t,l} RS'_{t,l} p_{t-l} + \sum_{l=1}^{(k+1)^{q-1}} rp_{t,l} \left( \prod_{ii=1}^p f_0(X_{t-ii-l}) \right) rs'_{t,l} q_{t-1-l}^{(0)} \quad (91)$$

and

$$q_{t-1}^{(0)} = \sum_{l=1}^{(k+1)^{q-1}} rp_{t,l} RQ'_{t,l} p_{t-l} + \sum_{l=1}^{(k+1)^{q-1}} rp_{t,l} \left( \prod_{ii=1}^p f_0(X_{t-ii-l}) \right) rq'_{t,l} q_{t-1-l}^{(0)}. \quad (92)$$

It can be seen from (91) that

$$p_t = \sum_{l=1}^{(k+1)^{q-1}} rp_{t,l} RS'_{t,l} p_{t-l}, \text{ if } \mathbf{X}_{t-1-l} \neq \mathbf{0}_p \text{ for all } l = 1, \dots, (k+1)^{q-1}. \quad (93)$$

Otherwise, define  $\mathcal{Y}_t := \{i = 1, \dots, (k+1)^{q-1} : \mathbf{X}_{t-1-i} = \mathbf{0}_p\}$  and  $\mathcal{N}_t := \{i = 1, \dots, (k+1)^{q-1} : \mathbf{X}_{t-1-i} \neq \mathbf{0}_p\}$ , such that (91) and (92) take the form

$$\begin{bmatrix} p_t \\ q_{t-1}^{(0)} \end{bmatrix} = \sum_{i \in \mathcal{Y}_t} rp_{t,i} RSQ_{t,i} \begin{bmatrix} p_{t-i} \\ q_{t-1-i}^{(0)} \end{bmatrix} + \sum_{i \in \mathcal{N}_t} rp_{t,i} L_{1:2,1}(RSQ_{t,i}) p_{t-i},$$

where  $RSQ_{t,i} := \begin{bmatrix} RS'_{t,i} & rs'_{t,i} \\ RQ'_{t,i} & rq'_{t,i} \end{bmatrix}$  and  $L_{i,j}$  now operates on matrices consisting of scalars.

It can be re-written that

$$\begin{bmatrix} p_t \\ q_{t-1}^{(0)} \end{bmatrix} = \sum_{i \in \mathcal{Y}_t} rp_{t,i} RSQ_{t,i} \begin{bmatrix} p_{t-i} \\ q_{t-1-i}^{(0)} \end{bmatrix} + \sum_{i \in \mathcal{N}_t} rp_{t,i-1} L_{1:2,1}(RSQ_{t,i}). \quad (94)$$

Write  $i_1(t) < \dots < i_{y_t}(t)$  for the members of  $\mathcal{Y}_t$  and  $j_1(t) < \dots < j_{n_t}(t)$  similarly for  $\mathcal{N}_t$ .

Then (94) becomes

$$\begin{bmatrix} p_t \\ q_{t-1}^{(0)} \end{bmatrix} = \sum_{c=1}^{y_t} rp_{t,i_c(t)} RSQ_{t,i_c(t)} \begin{bmatrix} p_{t-i_c(t)} \\ q_{t-1-i_c(t)}^{(0)} \end{bmatrix} + \sum_{c=1}^{n_t} rp_{t,j_c(t)-1} L_{1:2,1}(RSQ_{t,j_c(t)});$$

first,  $\begin{bmatrix} p_{t-i_1(t)} \\ q_{t-1-i_1(t)}^{(\mathbf{0})} \end{bmatrix}$  should be replaced, resulting in

$$\begin{aligned} \begin{bmatrix} p_t \\ q_{t-1}^{(\mathbf{0})} \end{bmatrix} &= \sum_{c=2}^{y_t} r p_{t,i_c(t)} R S Q_{t,i_c(t)} \begin{bmatrix} p_{t-i_c(t)} \\ q_{t-1-i_c(t)}^{(\mathbf{0})} \end{bmatrix} + \sum_{c=1}^{n_t} r p_{t,j_c(t)-1} L_{1:2,1}(R S Q_{t,j_c(t)}) + \\ &\quad \sum_{c=1}^{y_{t-i_1(t)}} r p_{t,i_1(t)+i_c(t-i_1(t))} R S Q_{t,i_1(t)} R S Q_{t-i_1(t),i_c(t-i_1(t))} \begin{bmatrix} p_{t-i_1(t)-i_c(t-i_1(t))} \\ q_{t-1-i_1(t)-i_c(t-i_1(t))}^{(\mathbf{0})} \end{bmatrix} + \\ &\quad \sum_{c=1}^{n_{t-i_1(t)}} r p_{t,i_1(t)+j_c(t-i_1(t))-1} R S Q_{t,i_1(t)} L_{1:2,1}(R S Q_{t-i_1(t),j_c(t-i_1(t))}), \end{aligned}$$

since

$$\begin{aligned} r p_{t,i_1(t)} r p_{t-i_1(t),i_c(t-i_1(t))} &= \frac{1}{p_{t-1} \cdots p_{t-i_1(t)}} \frac{1}{p_{t-i_1(t)-1} \cdots p_{t-i_1(t)-i_c(t-i_1(t))}} \\ &\equiv r p_{t,i_1(t)+i_c(t-i_1(t))}, \\ r p_{t,i_1(t)} r p_{t-i_1(t),j_c(t-i_1(t))-1} &= \frac{1}{p_{t-1} \cdots p_{t-i_1(t)}} \frac{1}{p_{t-i_1(t)-1} \cdots p_{t-i_1(t)-j_c(t-i_1(t))+1}} \\ &\equiv r p_{t,i_1(t)+j_c(t-i_1(t))-1}. \end{aligned}$$

Define

$$\mathcal{Y}_t^{\{1\}} := \{i = i_1(t) + 1, \dots, i_1(t) + (k+1)^{q-1} : \mathbf{X}_{t-1-i} = \mathbf{0}_p\}$$

and observe that

$$\mathcal{Y}_t^{\{1\}} := \{i_2(t), \dots, i_{y_t}(t)\} \cup \{i = (k+1)^{q-1} + 1, \dots, i_1(t) + (k+1)^{q-1} : \mathbf{X}_{t-1-i} = \mathbf{0}_p\};$$

write  $i_1^{\{1\}}(t) < \dots < i_{y_t}^{\{1\}}(t)$  for the members of  $\mathcal{Y}_t^{\{1\}}$  with  $i_c^{\{1\}}(t) \equiv i_{c+1}(t)$  for the first ones  $c = 1, \dots, y_t - 1$ . Note that

$$i \in \mathcal{Y}_t^{\{1\}} \text{ iff } i - i_1(t) = 1, \dots, (k+1)^{q-1} \text{ and } \mathbf{X}_{t-i-1} \equiv \mathbf{X}_{(t-i_1(t))-(i-i_1(t))-1} = \mathbf{0}_p$$

i.e.

$$i \in \mathcal{Y}_t^{\{1\}} \text{ iff } i - i_1(t) \in \mathcal{Y}_{t-i_1(t)}. \quad (95)$$

Statement (95) implies that  $i_c(t - i_1(t)) = i_c^{\{1\}}(t) - i_1(t)$  for  $c = 1, \dots, y_{t-i_1(t)} \equiv y_t^{\{1\}}$ , hence

$$\begin{aligned} \sum_{c=1}^{y_{t-i_1(t)}} r p_{t,i_1(t)+i_c(t-i_1(t))} R S Q_{t,i_1(t)} R S Q_{t-i_1(t),i_c(t-i_1(t))} \begin{bmatrix} p_{t-i_1(t)-i_c(t-i_1(t))} \\ q_{t-1-i_1(t)-i_c(t-i_1(t))}^{(\mathbf{0})} \end{bmatrix} &= \\ \sum_{c=1}^{y_t^{\{1\}}} r p_{t,i_c^{\{1\}}(t)} R S Q_{t,i_1(t)} R S Q_{t-i_1(t),i_c^{\{1\}}(t)-i_1(t)} \begin{bmatrix} p_{t-i_c^{\{1\}}(t)} \\ q_{t-1-i_c^{\{1\}}(t)}^{(\mathbf{0})} \end{bmatrix}. \end{aligned}$$

Also define  $\mathcal{N}_t^{\{1\}} := \{i = 1, \dots, i_1(t) + (k+1)^{q-1} : \mathbf{X}_{t-1-i} \neq \mathbf{0}_p\}$  and observe that

$$\mathcal{Y}_t^{\{1\}} \cup \mathcal{N}_t^{\{1\}} = \{1, \dots, i_1(t) - 1, i_1(t) + 1, \dots, i_1(t) + (k+1)^{q-1}\} \text{ and } \mathcal{Y}_t^{\{1\}} \cap \mathcal{N}_t^{\{1\}} = \emptyset;$$

write  $j_1^{\{1\}}(t) < \dots < j_{\{n_t^{\{1\}}\}}^{\{1\}}(t)$  for the members of  $\mathcal{N}_t^{\{1\}}$  with  $j_c^{\{1\}}(t) \equiv j_c(t)$  for  $c = 1, \dots, n_t \leq n_t^{\{1\}}$  since  $\mathcal{N}_t \subseteq \mathcal{N}_t^{\{1\}}$ . Note that

$$i \in \mathcal{N}_t^{\{1\}} \text{ iff } i - i_1(t) = 1 - i_1(t), \dots, (k+1)^{q-1} \text{ and } \mathbf{X}_{t-i_1(t)-1-(i-i_1(t))} \neq \mathbf{0}_p,$$

i.e.

$$i \in \mathcal{N}_t^{\{1\}} \text{ iff } i - i_1(t) \in \mathcal{N}_{t-i_1(t)} \text{ or } i - i_1(t) = 1 - i_1(t), \dots, -1. \quad (96)$$

Next to (96), it is written that

$$i \in \mathcal{N}_t^{\{1\}} \cap \{i : i > i_1(t)\} \text{ iff } i - i_1(t) \in \mathcal{N}_{t-i_1(t)}$$

and  $\mathcal{N}_t^{\{1\}} \cap \{i : i > i_1(t)\} = \{i_1^+(t), \dots, i_{n_t-i_1(t)}^+(t)\}$ , so that it is written that  $j_c(t - i_1(t)) = i_c^+(t) - i_1(t)$ ,  $c = 1, \dots, n_{t-i_1(t)}$ , hence

$$\begin{aligned} & \sum_{c=1}^{n_{t-i_1(t)}} r p_{t, i_1(t) + j_c(t-i_1(t)) - 1} \text{RSQ}_{t, i_1(t)} L_{1:2,1}(\text{RSQ}_{t-i_1(t), j_c(t-i_1(t))}) = \\ & \sum_{i \in \mathcal{N}_t^{\{1\}}, i > i_1(t)} r p_{t, i-1} \text{RSQ}_{t, i_1(t)} L_{1:2,1}(\text{RSQ}_{t-i_1(t), i-i_1(t)}). \end{aligned}$$

Altogether now,

$$\begin{aligned} \begin{bmatrix} p_t \\ q_{t-1}^{(\mathbf{0})} \end{bmatrix} &= \sum_{c=1}^{y_t-1} r p_{t, i_c^{\{1\}}(t)} \text{RSQ}_{t, i_c^{\{1\}}(t)} \begin{bmatrix} p_{t-i_c^{\{1\}}(t)} \\ q_{t-1-i_c^{\{1\}}(t)}^{(\mathbf{0})} \end{bmatrix} + \sum_{c=1}^{n_t} r p_{t, j_c^{\{1\}}(t)-1} L_{1:2,1}(\text{RSQ}_{t, j_c^{\{1\}}(t)}) + \\ & \sum_{c=1}^{y_t^{\{1\}}} r p_{t, i_c^{\{1\}}(t)} \text{RSQ}_{t, i_1(t)} \text{RSQ}_{t-i_1(t), i_c^{\{1\}}(t)-i_1(t)} \begin{bmatrix} p_{t-i_c^{\{1\}}(t)} \\ q_{t-1-i_c^{\{1\}}(t)}^{(\mathbf{0})} \end{bmatrix} + \\ & \sum_{i \in \mathcal{N}_t^{\{1\}}, i > i_1(t)} r p_{t, i-1} \text{RSQ}_{t, i_1(t)} L_{1:2,1}(\text{RSQ}_{t-i_1(t), i-i_1(t)}) \end{aligned}$$

or

$$\begin{bmatrix} p_t \\ q_{t-1}^{(\mathbf{0})} \end{bmatrix} = \sum_{i \in \mathcal{Y}_t^{\{1\}}} r p_{t, i} \text{RSQ}_{t, i}^{\{1\}} \begin{bmatrix} p_{t-i} \\ q_{t-1-i}^{(\mathbf{0})} \end{bmatrix} + \sum_{i \in \mathcal{N}_t^{\{1\}}} r p_{t, i-1} L_{1:2,1}(\text{RSQ}_{t, i}^{\{1\}})$$

where

$$\text{RSQ}_{t, i}^{\{1\}} := \begin{cases} \text{RSQ}_{t, i} + \text{RSQ}_{t, i_1(t)} \text{RSQ}_{t-i_1(t), i-i_1(t)}, \\ \text{if } i \in \mathcal{Y}_t^{\{1\}} \cap \mathcal{Y}_t \text{ or if } i \in \mathcal{N}_t, i > i_1(t), \\ \text{RSQ}_{t, i_1(t)} \text{RSQ}_{t-i_1(t), i-i_1(t)}, \\ \text{if } i \in \mathcal{Y}_t^{\{1\}}, i \notin \mathcal{Y}_t \text{ or if } i \in \mathcal{N}_t^{\{1\}}, i \notin \mathcal{N}_t, \\ \text{RSQ}_{t, i}, \text{ if } i = 1, \dots, i_1(t) - 1 \end{cases}.$$

For  $n = 2, \dots$ , accept that it can be written

$$\begin{bmatrix} p_t \\ q_{t-1}^{(\mathbf{0})} \end{bmatrix} = \sum_{i \in \mathcal{Y}_t^{\{n\}}} r p_{t, i} \text{RSQ}_{t, i}^{\{n\}} \begin{bmatrix} p_{t-i} \\ q_{t-1-i}^{(\mathbf{0})} \end{bmatrix} + \sum_{i \in \mathcal{N}_t^{\{n\}}} r p_{t, i-1} L_{1:2,1}(\text{RSQ}_{t, i}^{\{n\}}), \quad (97)$$

where

$$RSQ_{t,i}^{\{n\}} := \begin{cases} RSQ_{t,i}^{\{n-1\}} + RSQ_{t,i_1^{\{n-1\}}(t)}^{\{n-1\}} RSQ_{t-i_1^{\{n-1\}}(t),i-i_1^{\{n-1\}}(t)}, \\ \text{if } i \in \mathcal{Y}_t^{\{n\}} \cap \mathcal{Y}_t^{\{n-1\}} \text{ or if } i \in \mathcal{N}_t^{\{n-1\}}, i > i_1^{\{n-1\}}(t), \\ RSQ_{t,i_1^{\{n-1\}}(t)}^{\{n-1\}} RSQ_{t-i_1^{\{n-1\}}(t),i-i_1^{\{n-1\}}(t)}, \\ \text{if } i \in \mathcal{Y}_t^{\{n\}}, i \notin \mathcal{Y}_t^{\{n-1\}} \text{ or if } i \in \mathcal{N}_t^{\{n\}}, i \notin \mathcal{N}_t^{\{n-1\}}, \\ RSQ_{t,i}^{\{n-1\}}, \\ \text{if } i = 1, \dots, i_1^{\{n-1\}}(t) - 1, i \neq i_1(t), i_1^{\{1\}}(t), \dots, i_1^{\{n-2\}}(t) \end{cases} \quad (98)$$

and

$$\mathcal{Y}_t^{\{n\}} := \{i = i_1^{\{n-1\}}(t) + 1, \dots, i_1^{\{n-1\}}(t) + (k+1)^{q-1} : \mathbf{X}_{t-1-i} = \mathbf{0}_p\}$$

with members  $i_1^{\{n\}}(t) < \dots < i_{y_t^{\{n\}}}^{\{n\}}(t)$ , as well as

$$\mathcal{N}_t^{\{n\}} := \{i = 1, \dots, i_1^{\{n-1\}}(t) + (k+1)^{q-1} : \mathbf{X}_{t-1-i} \neq \mathbf{0}_p\}$$

with members  $j_1^{\{n\}}(t) < \dots < j_{n_t^{\{n\}}}^{\{n\}}(t)$ . In the second branch of (98), note that  $i \in \mathcal{N}_t^{\{n\}}$ ,  $i \notin \mathcal{N}_t^{\{n-1\}}$ , implies that  $\mathcal{N}_t^{\{n-1\}} \subset \mathcal{N}_t^{\{n\}}$  and  $i > j_{n_t^{\{n-1\}}}^{\{n-1\}}(t)$ ; if  $j_{n_t^{\{n-1\}}}^{\{n-1\}}(t) > i_1^{\{n-1\}}(t)$  then  $i > i_1^{\{n-1\}}(t)$ ; if, however,  $j_{n_t^{\{n-1\}}}^{\{n-1\}}(t) < i_1^{\{n-1\}}(t)$ , then it has to be that  $i_c^{\{n-1\}}(t) = i_{c-1}^{\{n-1\}}(t) + 1$ , for all  $c = 2, \dots, y_t^{\{n-1\}} \geq 2$ , such that  $i > i_{y_t^{\{n-1\}}}^{\{n-1\}}(t) \geq i_1^{\{n-1\}}(t)$ : either way it is implied  $i > i_1^{\{n-1\}}(t)$ .

Straight from (97) and using (94), it can be written that

$$\begin{aligned} \begin{bmatrix} p_t \\ q_{t-1}^{(0)} \end{bmatrix} &= \sum_{c=2}^{y_t^{\{n\}}} rp_{t,i_c^{\{n\}}(t)} RSQ_{t,i_c^{\{n\}}(t)}^{\{n\}} \begin{bmatrix} p_{t-i_c^{\{n\}}(t)} \\ q_{t-1-i_c^{\{n\}}(t)}^{(0)} \end{bmatrix} + \sum_{i \in \mathcal{N}_t^{\{n\}}} rp_{t,i-1} L_{1:2,1}(RSQ_{t,i}^{\{n\}}) + \\ &\sum_{c=1}^{y_{t-i_1^{\{n\}}(t)}^{\{n\}}} rp_{t,i_1^{\{n\}}(t)} rp_{t-i_1^{\{n\}}(t),i_c(t-i_1^{\{n\}}(t))} RSQ_{t,i_1^{\{n\}}(t)}^{\{n\}} RSQ_{t-i_1^{\{n\}}(t),i_c(t-i_1^{\{n\}}(t))} \cdot \\ &\begin{bmatrix} p_{t-i_1^{\{n\}}(t)-i_c(t-i_1^{\{n\}}(t))} \\ q_{t-i_1^{\{n\}}(t)-1-i_c(t-i_1^{\{n\}}(t))}^{(0)} \end{bmatrix} + \\ &\sum_{i \in \mathcal{N}_{t-i_1^{\{n\}}(t)}^{\{n\}}} rp_{t,i_1^{\{n\}}(t)} rp_{t-i_1^{\{n\}}(t),i-1} RSQ_{t,i_1^{\{n\}}(t)}^{\{n\}} L_{1:2,1}(RSQ_{t-i_1^{\{n\}}(t),i}^{\{n\}}). \end{aligned}$$

Note that

$$rp_{t,i_1^{\{n\}}(t)} rp_{t-i_1^{\{n\}}(t),j} = \frac{1}{p_{t-1} \dots p_{t-i_1^{\{n\}}(t)}} \frac{1}{p_{t-i_1^{\{n\}}(t)-1} \dots p_{t-i_1^{\{n\}}(t)-j}} \equiv rp_{t,i_1^{\{n\}}(t)+j},$$

so that it is written again

$$\begin{aligned}
& \begin{bmatrix} p_t \\ q_{t-1}^{(0)} \end{bmatrix} = \sum_{c=2}^{y_t^{\{n\}}} r p_{t, i_c^{\{n\}}(t)} R S Q_{t, i_c^{\{n\}}(t)}^{\{n\}} \begin{bmatrix} p_{t-i_c^{\{n\}}(t)} \\ q_{t-1-i_c^{\{n\}}(t)}^{(0)} \end{bmatrix} + \sum_{i \in \mathcal{N}_t^{\{n\}}} r p_{t, i-1} L_{1:2,1}(R S Q_{t,i}^{\{n\}}) \\
& + \sum_{c=1}^{y_{t-i_1^{\{n\}}(t)}} r p_{t, i_1^{\{n\}}(t)+i_c(t-i_1^{\{n\}}(t))} R S Q_{t, i_1^{\{n\}}(t)}^{\{n\}} R S Q_{t-i_1^{\{n\}}(t), i_c(t-i_1^{\{n\}}(t))}^{\{n\}} \begin{bmatrix} p_{t-i_1^{\{n\}}(t)-i_c(t-i_1^{\{n\}}(t))} \\ q_{t-i_1^{\{n\}}(t)-1-i_c(t-i_1^{\{n\}}(t))}^{(0)} \end{bmatrix} \\
& + \sum_{i \in \mathcal{N}_{t-i_1^{\{n\}}(t)}} r p_{t, i_1^{\{n\}}(t)+i-1} R S Q_{t, i_1^{\{n\}}(t)}^{\{n\}} L_{1:2,1}(R S Q_{t-i_1^{\{n\}}(t), i}^{\{n\}}).
\end{aligned}$$

Define  $\mathcal{Y}_t^{\{n+1\}} := \{i = i_1^{\{n\}}(t) + 1, \dots, i_1^{\{n\}}(t) + (k+1)^{q-1} : \mathbf{X}_{t-1-i} = \mathbf{0}_p\}$  and write  $i_1^{\{n+1\}}(t) < \dots < i_{y_t^{\{n+1\}}(t)}^{\{n+1\}}(t)$  for all its members in increasing order, clearly with  $i_c^{\{n+1\}}(t) = i_c^{\{n\}}(t)$  for the first ones  $c = 1, \dots, y_t^{\{n\}} - 1$ . Note that

$$i \in \mathcal{Y}_t^{\{n+1\}} \text{ iff } i - i_1^{\{n\}}(t) = 1, \dots, (k+1)^{q-1} \text{ and } \mathbf{X}_{(t-i_1^{\{n\}}(t))-1-(i-i_1^{\{n\}}(t))} = \mathbf{0}_p$$

i.e.

$$i \in \mathcal{Y}_t^{\{n+1\}} \text{ iff } i - i_1^{\{n\}}(t) \in \mathcal{Y}_{t-i_1^{\{n\}}(t)}^{\{n\}}. \quad (99)$$

Statement (99) implies that  $i_c(t - i_1^{\{n\}}(t)) = i_c^{\{n+1\}}(t) - i_1^{\{n\}}(t)$  for  $c = 1, \dots, y_{t-i_1^{\{n\}}(t)}^{\{n\}} \equiv y_t^{\{n+1\}}$ , hence

$$\begin{aligned}
& \sum_{c=1}^{y_{t-i_1^{\{n\}}(t)}} r p_{t, i_1^{\{n\}}(t)+i_c(t-i_1^{\{n\}}(t))} R S Q_{t, i_1^{\{n\}}(t)}^{\{n\}} R S Q_{t-i_1^{\{n\}}(t), i_c(t-i_1^{\{n\}}(t))}^{\{n\}} \begin{bmatrix} p_{t-i_1^{\{n\}}(t)-i_c(t-i_1^{\{n\}}(t))} \\ q_{t-i_1^{\{n\}}(t)-1-i_c(t-i_1^{\{n\}}(t))}^{(0)} \end{bmatrix} = \\
& \sum_{c=1}^{y_t^{\{n+1\}}} r p_{t, i_c^{\{n+1\}}(t)} R S Q_{t, i_1^{\{n\}}(t)}^{\{n\}} R S Q_{t-i_1^{\{n\}}(t), i_c^{\{n+1\}}(t)-i_1^{\{n\}}(t)}^{\{n\}} \begin{bmatrix} p_{t-i_c^{\{n+1\}}(t)} \\ q_{t-1-i_c^{\{n+1\}}(t)}^{(0)} \end{bmatrix}.
\end{aligned}$$

Also define  $\mathcal{N}_t^{\{n+1\}} := \{i = 1, \dots, i_1^{\{n\}}(t) + (k+1)^{q-1} : \mathbf{X}_{t-1-i} \neq \mathbf{0}_p\}$  and observe that  $\mathcal{Y}_t^{\{n+1\}} \cap \mathcal{N}_t^{\{n+1\}} = \emptyset$  and that

$$\mathcal{Y}_t^{\{n+1\}} \cup \mathcal{N}_t^{\{n+1\}} = \{i : i = 1, \dots, i_1^{\{n\}}(t) + (k+1)^{q-1}, i \neq i_1(t), i_1^{\{1\}}(t), \dots, i_1^{\{n\}}(t)\}.$$

Write  $j_1^{\{n+1\}}(t) < \dots < j_{n_t^{\{n+1\}}(t)}^{\{n+1\}}(t)$  for the members of  $\mathcal{N}_t^{\{n+1\}}$  with  $j_c^{\{n+1\}}(t) \equiv j_c^{\{n\}}(t)$  for  $c = 1, \dots, n_t^{\{n\}} \leq n_t^{\{n+1\}}$  since  $\mathcal{N}_t^{\{n\}} \subseteq \mathcal{N}_t^{\{n+1\}}$ . Note that

$$\begin{aligned}
i \in \mathcal{N}_t^{\{n+1\}} \text{ if } & i - i_1^{\{n\}}(t) \in \mathcal{N}_{t-i_1^{\{n\}}(t)}^{\{n\}} \\
& \text{or if } i - i_1^{\{n\}}(t) = 1 - i_1^{\{n\}}(t), \dots, -1 \text{ and} \\
& i - i_1^{\{n\}}(t) \neq i_1(t) - i_1^{\{n\}}(t), i_1^{\{1\}}(t) - i_1^{\{n\}}(t), \dots, i_1^{\{n-1\}}(t) - i_1^{\{n\}}(t).
\end{aligned} \quad (100)$$

Next to (100) (and (99)), it is written

$$i \in \mathcal{N}_t^{\{n+1\}} \cap \{i : i > i_1^{\{n\}}(t)\} \text{ iff } i - i_1^{\{n\}}(t) \in \mathcal{N}_{t-i_1^{\{n\}}(t)}$$

and  $\mathcal{N}_t^{\{n+1\}} \cap \{i : i > i_1^{\{n\}}(t)\} = \{i_1^{+(n+1)}(t), \dots, i_{n-i_1^{\{n\}}(t)}^{+(n+1)}(t)\}$ , so that it is written that  $j_c(t - i_1^{\{n\}}(t)) = i_c^{+(n+1)}(t) - i_1^{\{n\}}(t)$ ,  $c = 1, \dots, n_{t-i_1^{\{n\}}(t)}$ , hence

$$\begin{aligned} \sum_{i \in \mathcal{N}_{t-i_1^{\{n\}}(t)}} r p_{t, i_1^{\{n\}}(t)+i-1} RSQ_{t, i_1^{\{n\}}(t)}^{\{n\}} L_{1:2,1}(RSQ_{t-i_1^{\{n\}}(t), i}) = \\ \sum_{i \in \mathcal{N}_t^{\{n+1\}}, i > i_1^{\{n\}}(t)} r p_{t, i-1} RSQ_{t, i_1^{\{n\}}(t)}^{\{n\}} L_{1:2,1}(RSQ_{t-i_1^{\{n\}}(t), i-i_1^{\{n\}}(t)}). \end{aligned}$$

Putting all the above together, it is written

$$\begin{aligned} \begin{bmatrix} p_t \\ q_{t-1}^{(0)} \end{bmatrix} &= \sum_{c=2}^{y_t^{\{n\}}} r p_{t, i_c^{\{n\}}(t)} RSQ_{t, i_c^{\{n\}}(t)}^{\{n\}} \begin{bmatrix} p_{t-i_c^{\{n\}}(t)} \\ q_{t-1-i_c^{\{n\}}(t)}^{(0)} \end{bmatrix} + \sum_{i \in \mathcal{N}_t^{\{n\}}} r p_{t, i-1} L_{1:2,1}(RSQ_{t, i}^{\{n\}}) \\ &+ \sum_{c=1}^{y_t^{\{n+1\}}} r p_{t, i_c^{\{n+1\}}(t)} RSQ_{t, i_1^{\{n\}}(t)}^{\{n\}} RSQ_{t-i_1^{\{n\}}(t), i_c^{\{n+1\}}(t)-i_1^{\{n\}}(t)} \begin{bmatrix} p_{t-i_c^{\{n+1\}}(t)} \\ q_{t-1-i_c^{\{n+1\}}(t)}^{(0)} \end{bmatrix} \\ &+ \sum_{i \in \mathcal{N}_t^{\{n+1\}}, i > i_1^{\{n\}}(t)} r p_{t, i-1} RSQ_{t, i_1^{\{n\}}(t)}^{\{n\}} L_{1:2,1}(RSQ_{t-i_1^{\{n\}}(t), i-i_1^{\{n\}}(t)}) \end{aligned}$$

or

$$\begin{bmatrix} p_t \\ q_{t-1}^{(0)} \end{bmatrix} = \sum_{i \in \mathcal{Y}_t^{\{n+1\}}} r p_{t, i} RSQ_{t, i}^{\{n+1\}} \begin{bmatrix} p_{t-i} \\ q_{t-1-i}^{(0)} \end{bmatrix} + \sum_{i \in \mathcal{N}_t^{\{n+1\}}} r p_{t, i-1} L_{1:2,1}(RSQ_{t, i}^{\{n+1\}}),$$

where

$$RSQ_{t, i}^{\{n+1\}} := \begin{cases} RSQ_{t, i}^{\{n\}} + RSQ_{t, i_1^{\{n\}}(t)}^{\{n\}} RSQ_{t-i_1^{\{n\}}(t), i-i_1^{\{n\}}(t)}, & \text{if } i \in \mathcal{Y}_t^{\{n+1\}} \cap \mathcal{Y}_t^{\{n\}}, \text{ or if } i \in \mathcal{N}_t^{\{n\}}, i > i_1^{\{n\}}(t), \\ RSQ_{t, i_1^{\{n\}}(t)}^{\{n\}} RSQ_{t-i_1^{\{n\}}(t), i-i_1^{\{n\}}(t)}, & \text{if } i \in \mathcal{Y}_t^{\{n+1\}}, i \notin \mathcal{Y}_t^{\{n\}}, \text{ or if } i \in \mathcal{N}_t^{\{n+1\}}, i \notin \mathcal{N}_t^{\{n\}}, \\ RSQ_{t, i}^{\{n\}}, & \text{if } i = 1, \dots, i_1^{\{n\}}(t) - 1, i \neq i_1(t), i_1^{\{1\}}(t), \dots, i_1^{\{n-1\}}(t) \end{cases},$$

which justifies an induction argument.

It may be concluded that

$$p_t = \sum_{i=1}^{(k+1)^{q-1}} r p_{t, i-1} L_{1,1}(RSQ_{t, i}) + \sum_{i \in \mathcal{Y}_t} r p_{t, i} L_{1,2}(RSQ_{t, i}) q_{t-1-i}^{(0)} \quad (101)$$

and for  $n \in \mathbb{N}$ , that

$$p_t = \sum_{i=1}^{i_1^{\{n-1\}}(t) + (k+1)^{q-1}} r p_{t, i-1} L_{1,1}(RSQ_{t, i}^{\{n\}}) + \sum_{i \in \mathcal{Y}_t^{\{n\}}} r p_{t, i} L_{1,2}(RSQ_{t, i}^{\{n\}}) q_{t-1-i}^{(0)}, \quad (102)$$

where

$$RSQ_{t,i}^{\{n\}} = \begin{cases} RSQ_{t,i}^{\{n-1\}} + RSQ_{t,i_1^{\{n-1\}}(t)}^{\{n-1\}} RSQ_{t-i_1^{\{n-1\}}(t),i-i_1^{\{n-1\}}(t)}, \\ \text{if } i = i_1^{\{n-1\}}(t) + 1, \dots, i_1^{\{n-2\}}(t) + (k+1)^{q-1}, \\ \text{(provided that } i_1^{\{n-1\}}(t) + 1 \leq i_1^{\{n-2\}}(t) + (k+1)^{q-1}) \\ RSQ_{t,i_1^{\{n-1\}}(t)}^{\{n-1\}} RSQ_{t-i_1^{\{n-1\}}(t),i-i_1^{\{n-1\}}(t)}, \\ \text{if } i = i_1^{\{n-2\}}(t) + (k+1)^{q-1} + 1, \dots, i_1^{\{n-1\}}(t) + (k+1)^{q-1}, \\ RSQ_{t,i}^{\{n-1\}}, \\ \text{if } i = 1, \dots, i_1^{\{n-1\}}(t) - 1, \ i \neq i_1(t), i_1^{\{1\}}(t), \dots, i_1^{\{n-1\}}(t), \\ \begin{bmatrix} 0 & 0 \\ 0 & 0 \end{bmatrix}, \\ \text{if } i = i_1(t), i_1^{\{1\}}(t), \dots, i_1^{\{n-1\}}(t) \end{cases}$$

and writing  $RSQ_{t,i}^{\{0\}} \equiv RSQ_{t,i}$  and  $i_1^{\{0\}}(t) \equiv i_1(t)$  and  $i_1^{\{-1\}}(t) \equiv 0$ .

It holds that  $i \in \mathcal{Y}_t^{\{n\}}$  iff  $i - i_1^{\{n-1\}}(t) \in \mathcal{Y}_{t-i_1^{\{n-1\}}(t)}$ , so that (101) becomes

$$\begin{aligned} p_{t-i_1^{\{n-1\}}(t)} &= \sum_{i=1}^{(k+1)^{q-1}} rp_{t-i_1^{\{n-1\}}(t),i-1} L_{1,1}(RSQ_{t-i_1^{\{n-1\}}(t),i}) + \\ &\quad \sum_{i \in \mathcal{Y}_{t-i_1^{\{n-1\}}(t)}} rp_{t-i_1^{\{n-1\}}(t),i} L_{1,2}(RSQ_{t-i_1^{\{n-1\}}(t),i}) q_{t-i_1^{\{n-1\}}(t)-1-i}^{(0)} \\ &\equiv \sum_{i=i_1^{\{n-1\}}(t)+1}^{i_1^{\{n-1\}}(t)+(k+1)^{q-1}} rp_{t-i_1^{\{n-1\}}(t),i-i_1^{\{n-1\}}(t)-1} L_{1,1}(RSQ_{t-i_1^{\{n-1\}}(t),i-i_1^{\{n-1\}}(t)}) + \\ &\quad \sum_{i \in \mathcal{Y}_t^{\{n\}}} rp_{t-i_1^{\{n-1\}}(t),i-i_1^{\{n-1\}}(t)} L_{1,2}(RSQ_{t-i_1^{\{n-1\}}(t),i-i_1^{\{n-1\}}(t)}) q_{t-1-i}^{(0)} \end{aligned}$$

and solving with respect to  $q_{t-1-i_1^{\{n\}}(t)}^{(0)}$ , results in

$$\begin{aligned} q_{t-1-i_1^{\{n\}}(t)}^{(0)} &= \{rp_{t-i_1^{\{n-1\}}(t),i_1^{\{n\}}(t)-i_1^{\{n-1\}}(t)}\}^{-1} \{L_{1,2}(RSQ_{t-i_1^{\{n-1\}}(t),i_1^{\{n\}}(t)-i_1^{\{n-1\}}(t)})\}^{-1} \\ &\quad \left\{ p_{t-i_1^{\{n-1\}}(t)} - \sum_{i=i_1^{\{n-1\}}(t)+1}^{i_1^{\{n-1\}}(t)+(k+1)^{q-1}} rp_{t-i_1^{\{n-1\}}(t),i-i_1^{\{n-1\}}(t)-1} L_{1,1}(RSQ_{t-i_1^{\{n-1\}}(t),i-i_1^{\{n-1\}}(t)}) - \right. \\ &\quad \left. \sum_{c=2}^{y_t^{\{n\}}} rp_{t-i_1^{\{n-1\}}(t),i_c^{\{n\}}(t)-i_1^{\{n-1\}}(t)} L_{1,2}(RSQ_{t-i_1^{\{n-1\}}(t),i_c^{\{n\}}(t)-i_1^{\{n-1\}}(t)}) q_{t-1-i_c^{\{n\}}(t)}^{(0)} \right\}. \quad (103) \end{aligned}$$



Next, (103) is plugged in (102),  $n \in \mathbb{N}$ , which gives

$$\begin{aligned}
p_t = & \sum_{i=1}^{i_1^{\{n-1\}}(t)+(k+1)^{q-1}} rp_{t,i-1} L_{1,1}(RSQ_{t,i}^{\{n\}}) + \\
& \sum_{c=2}^{y_t^{\{n\}}} rp_{t,i_c^{\{n\}}(t)} L_{1,2}(RSQ_{t,i_c^{\{n\}}(t)}^{\{n\}}) q_{t-1-i_c^{\{n\}}(t)}^{(0)} + rp_{t,i_1^{\{n\}}(t)} \{L_{1,2}(RSQ_{t,i_1^{\{n\}}(t)}^{\{n\}})\} \cdot \\
& \{rp_{t-i_1^{\{n-1\}}(t),i_1^{\{n\}}(t)-i_1^{\{n-1\}}(t)}\}^{-1} \{L_{1,2}(RSQ_{t-i_1^{\{n-1\}}(t),i_1^{\{n\}}(t)-i_1^{\{n-1\}}(t)}^{\{n\}})\}^{-1} \\
& \left\{ p_{t-i_1^{\{n-1\}}(t)} - \sum_{i=i_1^{\{n-1\}}(t)+1}^{i_1^{\{n-1\}}(t)+(k+1)^{q-1}} rp_{t-i_1^{\{n-1\}}(t),i-i_1^{\{n-1\}}(t)-1} L_{1,1}(RSQ_{t-i_1^{\{n-1\}}(t),i-i_1^{\{n-1\}}(t)}^{\{n\}}) - \right. \\
& \left. \sum_{c=2}^{y_t^{\{n\}}} rp_{t-i_1^{\{n-1\}}(t),i_c^{\{n\}}(t)-i_1^{\{n-1\}}(t)} L_{1,2}(RSQ_{t-i_1^{\{n-1\}}(t),i_c^{\{n\}}(t)-i_1^{\{n-1\}}(t)}^{\{n\}}) q_{t-1-i_c^{\{n\}}(t)}^{(0)} \right\}.
\end{aligned}$$

And, of course, write

$$\{rp_{t,i_1^{\{n\}}(t)}\} \{rp_{t-i_1^{\{n-1\}}(t),i_1^{\{n\}}(t)-i_1^{\{n-1\}}(t)}\}^{-1} = \frac{p_{t-i_1^{\{n-1\}}(t)-1} \cdots p_{t-i_1^{\{n\}}(t)}}{p_{t-1} \cdots p_{t-i_1^{\{n\}}(t)}} \equiv rp_{t,i_1^{\{n-1\}}(t)}$$

and define  $HRSQ_{t,u}^{\{n\}} := \{L_{1,2}(RSQ_{t,u}^{\{n\}})\} \{L_{1,2}(RSQ_{t-i_1^{\{n-1\}}(t),u-i_1^{\{n-1\}}(t)}^{\{n\}})\}^{-1}$ , so that it is re-written

$$\begin{aligned}
p_t = & \sum_{i=1}^{i_1^{\{n-1\}}(t)+(k+1)^{q-1}} rp_{t,i-1} L_{1,1}(RSQ_{t,i}^{\{n\}}) + \\
& \sum_{c=2}^{y_t^{\{n\}}} rp_{t,i_c^{\{n\}}(t)} L_{1,2}(RSQ_{t,i_c^{\{n\}}(t)}^{\{n\}}) q_{t-1-i_c^{\{n\}}(t)}^{(0)} + \\
& rp_{t,i_1^{\{n-1\}}(t)} HRSQ_{t,i_1^{\{n\}}(t)}^{\{n\}} \left\{ p_{t-i_1^{\{n-1\}}(t)} - \right. \\
& \sum_{i=i_1^{\{n-1\}}(t)+1}^{i_1^{\{n-1\}}(t)+(k+1)^{q-1}} rp_{t-i_1^{\{n-1\}}(t),i-i_1^{\{n-1\}}(t)-1} L_{1,1}(RSQ_{t-i_1^{\{n-1\}}(t),i-i_1^{\{n-1\}}(t)}^{\{n\}}) - \\
& \left. \sum_{c=2}^{y_t^{\{n\}}} rp_{t-i_1^{\{n-1\}}(t),i_c^{\{n\}}(t)-i_1^{\{n-1\}}(t)} L_{1,2}(RSQ_{t-i_1^{\{n-1\}}(t),i_c^{\{n\}}(t)-i_1^{\{n-1\}}(t)}^{\{n\}}) q_{t-1-i_c^{\{n\}}(t)}^{(0)} \right\},
\end{aligned}$$

or  $(rp_{t,i_1^{\{n-1\}}(t)} rp_{t-i_1^{\{n-1\}}(t),i-i_1^{\{n-1\}}(t)} = rp_{t,i})$

$$p_t = \sum_{i=1}^{i_1^{\{n-1\}}(t)+(k+1)^{q-1}} rp_{t,i-1} bRSQ_{t,i}^{\{n\}} + \sum_{c=2}^{y_t^{\{n\}}} rp_{t,i_c^{\{n\}}(t)} BRSQ_{t,i_c^{\{n\}}(t)}^{\{n\}} q_{t-1-i_c^{\{n\}}(t)}^{(0)}, \quad (104)$$

where

$$bRSQ_{t,i}^{\{n\}} := \begin{cases} L_{1,1}(RSQ_{t,i}^{\{n\}}), \\ \text{if } i = 1, \dots, i_1^{\{n-1\}}(t) - 1, \\ L_{1,1}(RSQ_{t,i}^{\{n\}}) + HRSQ_{t,i_1^{\{n\}}(t)}^{\{n\}} \equiv HRSQ_{t,i_1^{\{n\}}(t)}^{\{n\}}, \\ \text{if } i = i_1^{\{n-1\}}(t), \\ L_{1,1}(RSQ_{t,i}^{\{n\}}) - HRSQ_{t,i_1^{\{n\}}(t)}^{\{n\}} \cdot L_{1,1}(RSQ_{t-i_1^{\{n-1\}}(t), i-i_1^{\{n-1\}}(t)}^{\{n\}}), \\ \text{if } i = i_1^{\{n-1\}}(t) + 1, \dots, i_1^{\{n-1\}}(t) + (k+1)^{q-1} \end{cases}$$

$$\text{and } BRSQ_{t,i}^{\{n\}} := L_{1,2}(RSQ_{t,i}^{\{n\}}) - HRSQ_{t,i_1^{\{n\}}(t)}^{\{n\}} \cdot L_{1,2}(RSQ_{t-i_1^{\{n-1\}}(t), i-i_1^{\{n-1\}}(t)}^{\{n\}}).$$

An induction argument is used next.

$n = 1$

Especially for  $n = 1$ , (104) becomes

$$p_t = \sum_{i=1}^{i_1(t)+(k+1)^{q-1}} rp_{t,i-1} bRSQ_{t,i}^{\{1\}} + \sum_{c=2}^{y_t^{\{1\}}} rp_{t,i_c^{\{1\}}(t)} BRSQ_{t,i_c^{\{1\}}(t)}^{\{1\}} q_{t-1-i_c^{\{1\}}(t)}^{(0)}.$$

For  $n = 2, 3, \dots$ , it holds that

$$i + i_1^{\{n-2\}}(t) \in \mathcal{Y}_t^{\{n\}} \quad \text{iff} \quad i \in \mathcal{Y}_{t-i_1^{\{n-2\}}(t)}^{\{1\}};$$

to understand this, observe that

$$(t - i_1^{\{n-2\}}(t)) - i_c^{\{1\}}(t - i_1^{\{n-2\}}(t)) = t - i_c^{\{n\}}(t),$$

i.e.

$$i_c^{\{1\}}(t - i_1^{\{n-2\}}(t)) = i_c^{\{n\}}(t) - i_1^{\{n-2\}}(t), \text{ for } c = 1, \dots, y_{t-i_1^{\{n-2\}}(t)}^{\{1\}} \equiv y_t^{\{n\}}.$$

As a result, the equation  $p_t$  above for  $t - i_1^{\{n-2\}}(t)$ ,  $n = 2, 3, \dots$ , becomes

$$\begin{aligned} p_{t-i_1^{\{n-2\}}(t)} &= \sum_{i=1}^{i_1(t-i_1^{\{n-2\}}(t))+(k+1)^{q-1}} rp_{t-i_1^{\{n-2\}}(t), i-1} bRSQ_{t-i_1^{\{n-2\}}(t), i}^{\{1\}} + \\ &\quad \sum_{c=2}^{y_{t-i_1^{\{n-2\}}(t)}^{\{1\}}} rp_{t-i_1^{\{n-2\}}(t), i_c^{\{1\}}(t-i_1^{\{n-2\}}(t))} BRSQ_{t-i_1^{\{n-2\}}(t), i_c^{\{1\}}(t-i_1^{\{n-2\}}(t))}^{\{1\}} q_{t-i_1^{\{n-2\}}(t)-1-i_c^{\{1\}}(t-i_1^{\{n-2\}}(t))}^{(0)} \\ &\equiv \sum_{i=1}^{i_1^{\{n-1\}}(t)-i_1^{\{n-2\}}(t)+(k+1)^{q-1}} rp_{t-i_1^{\{n-2\}}(t), i-1} bRSQ_{t-i_1^{\{n-2\}}(t), i}^{\{1\}} + \\ &\quad \sum_{c=2}^{y_t^{\{n\}}} rp_{t-i_1^{\{n-2\}}(t), i_c^{\{n\}}(t)-i_1^{\{n-2\}}(t)} BRSQ_{t-i_1^{\{n-2\}}(t), i_c^{\{n\}}(t)-i_1^{\{n-2\}}(t)}^{\{1\}} q_{t-1-i_c^{\{n\}}(t)}^{(0)}, \end{aligned}$$

since  $i_c(t - i_1^{\{n-2\}}(t)) = i_c^{\{n-1\}}(t) - i_1^{\{n-2\}}(t)$ . Re-write the first term, i.e.

$$p_{t-i_1^{\{n-2\}}(t)} = \sum_{i=i_1^{\{n-2\}}(t)+1}^{i_1^{\{n-1\}}(t)+(k+1)^{q-1}} rp_{t-i_1^{\{n-2\}}(t), i-i_1^{\{n-2\}}(t)-1} bRSQ_{t-i_1^{\{n-2\}}(t), i-i_1^{\{n-2\}}(t)}^{\{1\}} + \sum_{c=2}^{y_t^{\{n\}}} rp_{t-i_1^{\{n-2\}}(t), i_c^{\{n\}}(t)-i_1^{\{n-2\}}(t)} BRSQ_{t-i_1^{\{n-2\}}(t), i_c^{\{n\}}(t)-i_1^{\{n-2\}}(t)}^{\{1\}} q_{t-1-i_c^{\{n\}}(t)}^{(0)}.$$

Then it can be solved that

$$q_{t-1-i_2^{\{n\}}(t)}^{(0)} = \{rp_{t-i_1^{\{n-2\}}(t), i_2^{\{n\}}(t)-i_1^{\{n-2\}}(t)}\}^{-1} \{BRSQ_{t-i_1^{\{n-2\}}(t), i_2^{\{n\}}(t)-i_1^{\{n-2\}}(t)}^{\{1\}}\}^{-1} \left\{ p_{t-i_1^{\{n-2\}}(t)} - \sum_{i=i_1^{\{n-2\}}(t)+1}^{i_1^{\{n-1\}}(t)+(k+1)^{q-1}} rp_{t-i_1^{\{n-2\}}(t), i-i_1^{\{n-2\}}(t)-1} bRSQ_{t-i_1^{\{n-2\}}(t), i-i_1^{\{n-2\}}(t)}^{\{1\}} - \sum_{c=3}^{y_t^{\{n\}}} rp_{t-i_1^{\{n-2\}}(t), i_c^{\{n\}}(t)-i_1^{\{n-2\}}(t)} BRSQ_{t-i_1^{\{n-2\}}(t), i_c^{\{n\}}(t)-i_1^{\{n-2\}}(t)}^{\{1\}} q_{t-1-i_c^{\{n\}}(t)}^{(0)} \right\}. \quad (105)$$

Once (105) is plugged in (104) but for  $n = 2, 3, \dots$  now, these become

$$p_t = \sum_{i=1}^{i_1^{\{n-1\}}(t)+(k+1)^{q-1}} rp_{t,i-1} bRSQ_{t,i}^{\{n\}} + \sum_{c=3}^{y_t^{\{n\}}} rp_{t,i_c^{\{n\}}(t)} BRSQ_{t,i_c^{\{n\}}(t)}^{\{n\}} q_{t-1-i_c^{\{n\}}(t)}^{(0)} + rp_{t,i_2^{\{n\}}(t)} BRSQ_{t,i_2^{\{n\}}(t)}^{\{n\}} \{rp_{t-i_1^{\{n-2\}}(t), i_2^{\{n\}}(t)-i_1^{\{n-2\}}(t)}\}^{-1} \{BRSQ_{t-i_1^{\{n-2\}}(t), i_2^{\{n\}}(t)-i_1^{\{n-2\}}(t)}^{\{1\}}\}^{-1} \left\{ p_{t-i_1^{\{n-2\}}(t)} - \sum_{i=i_1^{\{n-2\}}(t)+1}^{i_1^{\{n-1\}}(t)+(k+1)^{q-1}} rp_{t-i_1^{\{n-2\}}(t), i-i_1^{\{n-2\}}(t)-1} bRSQ_{t-i_1^{\{n-2\}}(t), i-i_1^{\{n-2\}}(t)}^{\{1\}} - \sum_{c=3}^{y_t^{\{n\}}} rp_{t-i_1^{\{n-2\}}(t), i_c^{\{n\}}(t)-i_1^{\{n-2\}}(t)} BRSQ_{t-i_1^{\{n-2\}}(t), i_c^{\{n\}}(t)-i_1^{\{n-2\}}(t)}^{\{1\}} q_{t-1-i_c^{\{n\}}(t)}^{(0)} \right\}$$

or, since  $\{rp_{t,i_2^{\{n\}}(t)}\} \{rp_{t-i_1^{\{n-2\}}(t), i_2^{\{n\}}(t)-i_1^{\{n-2\}}(t)}\}^{-1} \equiv rp_{t,i_1^{\{n-2\}}(t)}$ , they become

$$p_t = \sum_{i=1}^{i_1^{\{n-1\}}(t)+(k+1)^{q-1}} rp_{t,i-1} b^2RSQ_{t,i}^{\{n\}} + \sum_{c=3}^{y_t^{\{n\}}} rp_{t,i_c^{\{n\}}(t)} B^2RSQ_{t,i_c^{\{n\}}(t)}^{\{n\}} q_{t-1-i_c^{\{n\}}(t)}^{(0)}$$

where  $HBR SQ_{t,u}^{\{n\}} := \{BRSQ_{t,u}^{\{n\}}\} \{BRSQ_{t-i_1^{\{n-2\}}(t), u-i_1^{\{n-2\}}(t)}^{\{1\}}\}^{-1}$ , and

$$b^2RSQ_{t,i}^{\{n\}} := \begin{cases} bRSQ_{t,i}^{\{n\}}, & \text{if } i = 1, \dots, i_1^{\{n-2\}}(t) - 1, \\ bRSQ_{t,i}^{\{n\}} + HBR SQ_{t,i_2^{\{n\}}(t)}^{\{n\}}, & \text{if } i = i_1^{\{n-2\}}(t), \\ bRSQ_{t,i}^{\{n\}} - HBR SQ_{t,i_2^{\{n\}}(t)}^{\{n\}} \cdot bRSQ_{t-i_1^{\{n-2\}}(t), i-i_1^{\{n-2\}}(t)}^{\{1\}}, & \text{if } i = i_1^{\{n-2\}}(t) + 1, \dots, i_1^{\{n-1\}}(t) + (k+1)^{q-1} \end{cases}$$

$$\text{and } B^2RSQ_{t,i}^{\{n\}} := BRSQ_{t,i}^{\{n\}} - HBR SQ_{t,i_2^{\{n\}}(t)}^{\{n\}} \cdot BRSQ_{t-i_1^{\{n-2\}}(t), i-i_1^{\{n-2\}}(t)}^{\{1\}}.$$

$n = \nu$

For  $\nu = 2, \dots$ , accept that it holds (for  $n = \nu + 1, \nu + 2, \dots$  only) that

$$p_t = \sum_{i=1}^{i_1^{\{n-1\}}(t) + (k+1)^{q-1}} rp_{t,i-1} b^{\nu+1} RSQ_{t,i}^{\{n\}} + \sum_{c=\nu+2}^{y_t^{\{n\}}} rp_{t,i_c^{\{n\}}(t)} B^{\nu+1} RSQ_{t,i_c^{\{n\}}(t)}^{\{n\}} q_{t-1-i_c^{\{n\}}(t)}^{(0)}, \quad (106)$$

where  $B^{\nu+1} RSQ_{t,i}^{\{n\}} := B^{\nu} RSQ_{t,i}^{\{n\}} - HB^{\nu} RSQ_{t,i_{\nu+1}^{\{n\}}(t)}^{\{n\}} \cdot B^{\nu} RSQ_{t-i_1^{\{n-(\nu+1)\}}(t), i-i_1^{\{n-(\nu+1)\}}(t)}^{\{\nu\}}$ ,  
and

$$b^{\nu+1} RSQ_{t,i}^{\{n\}} := \begin{cases} b^{\nu} RSQ_{t,i}^{\{n\}}, & \text{if } i = 1, \dots, i_1^{\{n-(\nu+1)\}}(t) - 1, \\ b^{\nu} RSQ_{t,i}^{\{n\}} + HB^{\nu} RSQ_{t,i_{\nu+1}^{\{n\}}(t)}^{\{n\}}, & \text{if } i = i_1^{\{n-(\nu+1)\}}(t), \\ b^{\nu} RSQ_{t,i}^{\{n\}} - HB^{\nu} RSQ_{t,i_{\nu+1}^{\{n\}}(t)}^{\{n\}} \cdot b^{\nu} RSQ_{t-i_1^{\{n-(\nu+1)\}}(t), i-i_1^{\{n-(\nu+1)\}}(t)}^{\{\nu\}}, & \text{if } i = i_1^{\{n-(\nu+1)\}}(t) + 1, \dots, i_1^{\{n-1\}}(t) + (k+1)^{q-1} \end{cases}$$

as well as  $HB^{\nu} RSQ_{t,u}^{\{n\}} := \{B^{\nu} RSQ_{t,u}^{\{n\}}\} \{B^{\nu} RSQ_{t-i_1^{\{n-(\nu+1)\}}(t), u-i_1^{\{n-(\nu+1)\}}(t)}^{\{\nu\}}\}^{-1}$ .

$n = \nu + 1$

Straight from (106) when  $n = \nu + 1$ , it is derived that

$$p_t = \sum_{i=1}^{i_1^{\{\nu\}}(t) + (k+1)^{q-1}} rp_{t,i-1} b^{\nu+1} RSQ_{t,i}^{\{\nu+1\}} + \sum_{c=\nu+2}^{y_t^{\{\nu+1\}}} rp_{t,i_c^{\{\nu+1\}}(t)} B^{\nu+1} RSQ_{t,i_c^{\{\nu+1\}}(t)}^{\{\nu+1\}} q_{t-1-i_c^{\{\nu+1\}}(t)}^{(0)}.$$

Nevertheless, for  $n = \nu + 2, \dots$ , it holds that

$$i + i_1^{\{n-(\nu+2)\}}(t) \in \mathcal{Y}_t^{\{n\}} \quad \text{iff} \quad i \in \mathcal{Y}_{t-i_1^{\{n-(\nu+2)\}}(t)}^{\{\nu+1\}};$$

to be convinced about this, see that

$$(t - i_1^{\{n-(\nu+2)\}}(t)) - i_c^{\{\nu+1\}}(t - i_1^{\{n-(\nu+2)\}}(t)) = t - i_c^{\{n\}}(t),$$

i.e.

$$i_c^{\{\nu+1\}}(t - i_1^{\{n-(\nu+2)\}}(t)) = i_c^{\{n\}}(t) - i_1^{\{n-(\nu+2)\}}(t), \quad c = 1, \dots, y_{t-i_1^{\{n-(\nu+2)\}}(t)}^{\{\nu+1\}} \equiv y_t^{\{n\}}.$$

Then the equation above is used for  $t - i_1^{\{n-(\nu+2)\}}(t)$ , resulting in

$$\begin{aligned}
p_{t-i_1^{\{n-(\nu+2)\}}(t)} &= \sum_{i=1}^{i_1^{\{\nu\}}(t-i_1^{\{n-(\nu+2)\}}(t))+(k+1)^{q-1}} rp_{t-i_1^{\{n-(\nu+2)\}}(t),i-1} b^{\nu+1} RSQ_{t-i_1^{\{n-(\nu+2)\}}(t),i}^{\{\nu+1\}} + \\
&\quad y_{t-i_1^{\{n-(\nu+2)\}}(t)}^{\{\nu+1\}} \sum_{c=\nu+2} rp_{t-i_1^{\{n-(\nu+2)\}}(t),i_c^{\{\nu+1\}}(t-i_1^{\{n-(\nu+2)\}}(t))} B^{\nu+1} RSQ_{t-i_1^{\{n-(\nu+2)\}}(t),i_c^{\{\nu+1\}}(t-i_1^{\{n-(\nu+2)\}}(t))}^{\{\nu+1\}} \\
&\quad q_{t-i_1^{\{n-(\nu+2)\}}(t)-1-i_c^{\{\nu+1\}}(t-i_1^{\{n-(\nu+2)\}}(t))}^{(0)} \equiv \\
&\quad i_1^{\{n-1\}}(t)-i_1^{\{n-(\nu+2)\}}(t)+(k+1)^{q-1} \sum_{i=1} rp_{t-i_1^{\{n-(\nu+2)\}}(t),i-1} b^{\nu+1} RSQ_{t-i_1^{\{n-(\nu+2)\}}(t),i}^{\{\nu+1\}} + \\
&\quad \sum_{c=\nu+2}^{y_t^{\{n\}}} rp_{t-i_1^{\{n-(\nu+2)\}}(t),i_c^{\{n\}}(t)-i_1^{\{n-(\nu+2)\}}(t)} B^{\nu+1} RSQ_{t-i_1^{\{n-(\nu+2)\}}(t),i_c^{\{n\}}(t)-i_1^{\{n-(\nu+2)\}}(t)}^{\{\nu+1\}} q_{t-1-i_c^{\{n\}}(t)}^{(0)}
\end{aligned}$$

since  $i_c^{\{\nu\}}(t-i_1^{\{n-(\nu+2)\}}(t)) = i_c^{\{n-1\}}(t) - i_1^{\{n-(\nu+2)\}}(t)$ . Finally, after re-arranging the index of the first term to  $i + i_1^{\{n-(\nu+2)\}}(t)$ , it holds that

$$\begin{aligned}
p_{t-i_1^{\{n-(\nu+2)\}}(t)} &= \\
&\quad i_1^{\{n-1\}}(t)+(k+1)^{q-1} \sum_{i=i_1^{\{n-(\nu+2)\}}(t)+1} rp_{t-i_1^{\{n-(\nu+2)\}}(t),i-i_1^{\{n-(\nu+2)\}}(t)-1} b^{\nu+1} RSQ_{t-i_1^{\{n-(\nu+2)\}}(t),i-i_1^{\{n-(\nu+2)\}}(t)}^{\{\nu+1\}} + \\
&\quad \sum_{c=\nu+2}^{y_t^{\{n\}}} rp_{t-i_1^{\{n-(\nu+2)\}}(t),i_c^{\{n\}}(t)-i_1^{\{n-(\nu+2)\}}(t)} B^{\nu+1} RSQ_{t-i_1^{\{n-(\nu+2)\}}(t),i_c^{\{n\}}(t)-i_1^{\{n-(\nu+2)\}}(t)}^{\{\nu+1\}} q_{t-1-i_c^{\{n\}}(t)}^{(0)},
\end{aligned}$$

which may be re-arranged to write

$$\begin{aligned}
q_{t-1-i_{\nu+2}^{\{n\}}(t)}^{(0)} &= \{rp_{t-i_1^{\{n-(\nu+2)\}}(t),i_{\nu+2}^{\{n\}}(t)-i_1^{\{n-(\nu+2)\}}(t)}\}^{-1} \{B^{\nu+1} RSQ_{t-i_1^{\{n-(\nu+2)\}}(t),i_{\nu+2}^{\{n\}}(t)-i_1^{\{n-(\nu+2)\}}(t)}^{\{\nu+1\}}\}^{-1} \\
&\quad \left\{ p_{t-i_1^{\{n-(\nu+2)\}}(t)} - \right. \\
&\quad i_1^{\{n-1\}}(t)+(k+1)^{q-1} \sum_{i=i_1^{\{n-(\nu+2)\}}(t)+1} rp_{t-i_1^{\{n-(\nu+2)\}}(t),i-i_1^{\{n-(\nu+2)\}}(t)-1} b^{\nu+1} RSQ_{t-i_1^{\{n-(\nu+2)\}}(t),i-i_1^{\{n-(\nu+2)\}}(t)}^{\{\nu+1\}} - \\
&\quad \left. \sum_{c=\nu+3}^{y_t^{\{n\}}} rp_{t-i_1^{\{n-(\nu+2)\}}(t),i_c^{\{n\}}(t)-i_1^{\{n-(\nu+2)\}}(t)} B^{\nu+1} RSQ_{t-i_1^{\{n-(\nu+2)\}}(t),i_c^{\{n\}}(t)-i_1^{\{n-(\nu+2)\}}(t)}^{\{\nu+1\}} q_{t-1-i_c^{\{n\}}(t)}^{(0)} \right\}.
\end{aligned} \tag{107}$$

Once (107) is inserted in (106) (for  $n = \nu + 2, \nu + 3, \dots$ ), this becomes

$$p_t = \sum_{i=1}^{i_1^{\{n-1\}}(t)+(k+1)^{q-1}} rp_{t,i-1} b^{\nu+2} RSQ_{t,i}^{\{n\}} + \sum_{c=\nu+3}^{y_t^{\{n\}}} rp_{t,i_c^{\{n\}}(t)} B^{\nu+2} RSQ_{t,i_c^{\{n\}}(t)}^{\{n\}} q_{t-1-i_c^{\{n\}}(t)}^{(0)},$$

where  $HB^{\nu+1}RSQ_{t,u}^{\{n\}} := \{B^{\nu+1}RSQ_{t,u}^{\{n\}}\} \{B^{\nu+1}RSQ_{t-i_1^{\{n-(\nu+2)\}}(t), u-i_1^{\{n-(\nu+2)\}}(t)}^{\{\nu+1\}}\}^{-1}$ , and

$$b^{\nu+2}RSQ_{t,i}^{\{n\}} = \begin{cases} b^{\nu+1}RSQ_{t,i}^{\{n\}}, \\ \text{if } i = 1, \dots, i_1^{\{n-(\nu+2)\}}(t) - 1, \\ b^{\nu+1}RSQ_{t,i}^{\{n\}} + HB^{\nu+1}RSQ_{t,i_{\nu+2}^{\{n\}}(t)}^{\{n\}}, \\ \text{if } i = i_1^{\{n-(\nu+2)\}}(t), \\ b^{\nu+1}RSQ_{t,i}^{\{n\}} - HB^{\nu+1}RSQ_{t,i_{\nu+2}^{\{n\}}(t)}^{\{n\}} \cdot b^{\nu+1}RSQ_{t-i_1^{\{n-(\nu+2)\}}(t), i-i_1^{\{n-(\nu+2)\}}(t)}^{\{\nu+1\}}, \\ \text{if } i = i_1^{\{n-(\nu+2)\}}(t) + 1, \dots, i_1^{\{n-1\}}(t) + (k+1)^{q-1} \end{cases}$$

and  $B^{\nu+2}RSQ_{t,i}^{\{n\}} := B^{\nu+1}RSQ_{t,i}^{\{n\}} - HB^{\nu+1}RSQ_{t,i_{\nu+2}^{\{n\}}(t)}^{\{n\}} \cdot B^{\nu+1}RSQ_{t-i_1^{\{n-(\nu+2)\}}(t), i-i_1^{\{n-(\nu+2)\}}(t)}^{\{\nu+1\}}$ .

Hence the induction argument has been proven. Then

$$p_t = \sum_{i=1}^{i_1^{\{\nu\}}(t) + (k+1)^{q-1}} rp_{t,i-1} b^{\nu+1}RSQ_{t,i}^{\{\nu+1\}} + \sum_{c=\nu+2}^{y_t^{\{\nu+1\}}} rp_{t,i_c^{\{\nu+1\}}(t)} B^{\nu+1}RSQ_{t,i_c^{\{\nu+1\}}(t)}^{\{\nu+1\}} q_{t-1-i_c^{\{\nu+1\}}(t)}^{(0)},$$

is the special case of (106) when  $n = \nu + 1$ .

This process will not continue indefinitely and it is determined next when to end it. Define

$$f_t^{\{0\}} := \min\{n \in \mathbb{N}_0 : y_t^{\{n\}} = 0\}.$$

To start with, it is checked whether  $y_t^{\{0\}} \equiv y_t$  is equal to zero, i.e. whether  $\mathbf{X}_{t-1-i} \neq \mathbf{0}_p$  for all  $i = 1, \dots, (k+1)^{q-1}$ . If it is zero, then  $f_t^{\{0\}} := 0$ ; otherwise there is at least one ‘lag’  $i = i_1(t)$ , such that  $\mathbf{X}_{t-1-i_1(t)} = \mathbf{0}_p$ , so that it is checked whether  $\mathbf{X}_{t-1-i_1(t)-1-i} \neq \mathbf{0}_p$  for all  $i = 1, \dots, (k+1)^{q-1}$ . If they are all not zero vectors or  $y_t^{\{1\}} = 0$ , then  $f_t^{\{0\}} := 1$ . Otherwise, there is at least one ‘lag’  $i_1^{\{1\}}(t)$  to let us define a new set  $\mathcal{Y}_t^{\{2\}}$  and check its cardinality  $y_t^{\{2\}}$ , and so on. According to (102), it may be written that

$$p_t = \sum_{i=1}^{i_1^{\{f_t^{\{0\}}-1\}}(t) + (k+1)^{q-1}} rp_{t,i-1} L_{1,1}(RSQ_{t,i}^{\{f_t^{\{0\}}\}}). \quad (108)$$

If  $f_t^{\{0\}} = 0$  ( $i_1^{\{-1\}}(t) \equiv 0$ ) then (108) is replaced by (93) as it has already been presented.

If  $y_t \geq 1$ , then  $\mathcal{Y}_t^{\{1\}}$  (with cardinality  $y_t^{\{1\}}$ ) starts within the  $1, \dots, (k+1)^{q-1}$  steps from  $\mathcal{Y}_t$ : it is meaningful to observe the random variable

$$f_t^{\{1\}} := \min\{n = 1, 2, \dots : y_t^{\{n\}} = 1\}.$$

First, suppose that it is  $y_t^{\{1\}} = 1$ , i.e.  $f_t^{\{1\}} = 1$ . Then suppose that it is  $2 \leq y_t^{\{1\}} \leq (k+1)^{q-1}$ , which means one should ‘wait for’ the cardinalities  $y_t^{\{2\}}, \dots, y_t^{\{y_t^{\{1\}}\}}$ , ... of the following  $\mathcal{Y}$  to

‘fall’ to 1. Nevertheless, if  $y_t^{\{1\}} = 0$  (implying that  $f_t^{\{1\}} > 1$ ), which must mean that  $y_t = 1$  there is no ‘lag’ within  $\mathcal{Y}_t^{\{1\}}$  to show good sense to continue: this will be combined with  $f_t^{\{0\}} \equiv 1 < f_t^{\{1\}}$  and the minimum will be picked to stop. Hence *provided that*  $y_t^{\{1\}} \geq 1$  (and according to (104)), it is written that

$$p_t = \sum_{i=1}^{i_1^{\{f_t^{\{1\}}-1\}}(t)+(k+1)^{q-1}} r p_{t,i-1} b RSQ_{t,i}^{\{f_t^{\{1\}}\}}.$$

Similarly for any  $l = 2, \dots, (k+1)^{q-1}$ , provided that  $y_t^{\{2\}} \geq 2, \dots, y_t^{\{(k+1)^{q-1}\}} = (k+1)^{q-1}$ , respectively, the random variable

$$f_t^{\{l\}} := \min\{n = l, l+1, \dots : y_t^{\{n\}} = l\}$$

becomes of interest, and it may be written that

$$p_t = \sum_{i=1}^{i_1^{\{f_t^{\{l\}}-1\}}(t)+(k+1)^{q-1}} r p_{t,i-1} b^l RSQ_{t,i}^{\{f_t^{\{l\}}\}}.$$

Hence, it is defined here that

$$\gamma_t := \min_{r=0,1,\dots,(k+1)^{q-1}} \{f_t^{\{r\}}\} \quad (109)$$

together with

$$\delta_t := \operatorname{argmin}_{r=0,1,\dots,(k+1)^{q-1}} \{f_t^{\{r\}}\} \quad (110)$$

since it cannot be that  $f_t^{\{r_1\}} = f_t^{\{r_2\}}$  for  $r_1 \neq r_2$ .

It may be concluded from (109) and all the above that  $\mathbb{P}(\gamma_t \leq (k+1)^{q-1}) = 1$ ; this is something that could be seen directly during the eliminations in (b) when deterministically there would be a long string of 0s only, i.e. the opposite of the  $\{y_t = 0\}$  scenario.

Thanks to the definitions (109) and (110), it can be concluded that

$$p_t = \sum_{i=1}^{i_1^{\{\gamma_t-1\}}(t)+(k+1)^{q-1}} r p_{t,i-1} \beta^{\delta_t+1} RSQ_{t,i}^{\{\gamma_t\}},$$

where it is written for convenience  $\beta RSQ^{\{x\}} = L_{1,1}(RSQ^{\{x\}})$  and  $\beta^{l+1} RSQ^{\{x\}} = b^l RSQ^{\{x\}}$ ,  $l \geq 1$ .
