# Supplementary material
Source: publisher figshare collection journal article supplement (https://tandf.figshare.com/articles/dataset/_/7160663)
Supplement: Supplementary file 3 [file 1]

**First Online Supplement:**  
**A Glimpse at The  $\text{TMA}(\infty)$  Representation of The TARMA**

Chrysoula Dimitriou-Fakalou  
Email: my.submission@mail.com

Define for convenience the vectors

$$\mathbf{vl}_p((l_1, \dots, l_h)|(i_1, \dots, i_h)) := (\mathbf{0}_{l_1-1}, i_1, \mathbf{0}_{l_2-l_1-1}, i_2, \dots, i_h, \mathbf{0}_{p-l_h}), \quad h = 1, \dots, p :$$

$$\begin{aligned}
f_x(X_t) &= f_x(I_t) + \sum_{h_q^{(1)}=1}^q \sum_{\substack{n^{(1)}(1), \dots, n^{(1)}(h_q^{(1)})=1 \\ n^{(1)}(1) < \dots < n^{(1)}(h_q^{(1)})}}^q \sum_{j_{n^{(1)}(1)}^{(1)}(1), \dots, j_{n^{(1)}(h_q^{(1)})}^{(1)}(h_q^{(1)})=v_1, \dots, v_k} \\
& d^{h_q^{(1)}} f_x(I_t^{(\mathbf{0}_p | \mathbf{vl}_q((n^{(1)}(1), \dots, n^{(1)}(h_q^{(1)})) | (j_{n^{(1)}(1)}^{(1)}(1), \dots, j_{n^{(1)}(h_q^{(1)})}^{(1)}(h_q^{(1)})))))) \cdot \left( \prod_{r=1}^{h_q^{(1)}} f_{j_{n^{(1)}(r)}^{(1)}(r)}(I_{t-n^{(1)}(r)}) \right) + \\
& \sum_{h_p^{(1)}=1}^p \sum_{h_q^{(1)}=0}^q \sum_{\substack{l^{(1)}(1), \dots, l^{(1)}(h_p^{(1)})=1 \\ l^{(1)}(1) < \dots < l^{(1)}(h_p^{(1)})}}^p \sum_{\substack{n^{(1)}(1), \dots, n^{(1)}(h_q^{(1)})=1 \\ n^{(1)}(1) < \dots < n^{(1)}(h_q^{(1)})}}^q \\
& \sum_{i_{l^{(1)}(1)}^{(1)}(1), \dots, i_{l^{(1)}(h_p^{(1)})}^{(1)}(h_p^{(1)}), j_{n^{(1)}(1)}^{(1)}(1), \dots, j_{n^{(1)}(h_q^{(1)})}^{(1)}(h_q^{(1)})=v_1, \dots, v_k} \\
& d^{h_p^{(1)}+h_q^{(1)}} f_x(I_t^{(\mathbf{vl}_p((l^{(1)}(1), \dots, l^{(1)}(h_p^{(1)})) | (i_{l^{(1)}(1)}^{(1)}(1), \dots, i_{l^{(1)}(h_p^{(1)})}^{(1)}(h_p^{(1)}))) | \mathbf{vl}_q((n^{(1)}(1), \dots, n^{(1)}(h_q^{(1)})) | (j_{n^{(1)}(1)}^{(1)}(1), \dots, j_{n^{(1)}(h_q^{(1)})}^{(1)}(h_q^{(1)})))))) \\
& \left( \prod_{r=1}^{h_p^{(1)}} f_{i_{l^{(1)}(r)}^{(1)}(r)}(I_{t-l^{(1)}(r)}) \right) \left( \prod_{r=1}^{h_q^{(1)}} f_{j_{n^{(1)}(r)}^{(1)}(r)}(I_{t-n^{(1)}(r)}) \right) + \\
& \sum_{h_p^{(1)}=1}^p \sum_{h_q^{(1)}=0}^q \sum_{\substack{l^{(1)}(1), \dots, l^{(1)}(h_p^{(1)})=1 \\ l^{(1)}(1) < \dots < l^{(1)}(h_p^{(1)})}}^p \sum_{\substack{n^{(1)}(1), \dots, n^{(1)}(h_q^{(1)})=1 \\ n^{(1)}(1) < \dots < n^{(1)}(h_q^{(1)})}}^q \\
& \sum_{w_q^{(2)}=1}^{h_p^{(1)}} \sum_{\substack{\tau^{(2)}(1), \dots, \tau^{(2)}(w_q^{(2)})=1 \\ \tau^{(2)}(1) < \dots < \tau^{(2)}(w_q^{(2)})}}^{h_p^{(1)}} \sum_{\substack{h_q^{(2)}(l^{(1)}(\tau^{(2)}(r)))=1 \\ r=1, \dots, w_q^{(2)}}^q \\
& \sum_{\substack{n^{(2)}(1), \dots, n^{(2)}(h_q^{(2)}(l^{(1)}(\tau^{(2)}(r))))=1 \\ n^{(2)}(1) < \dots < n^{(2)}(h_q^{(2)}(l^{(1)}(\tau^{(2)}(r)))) \\ r=1, \dots, w_q^{(2)}}^q \\
& \sum_{\substack{i_{l^{(1)}(r)}^{(1)}(r)=v_1, \dots, v_k \\ r=1, \dots, h_p^{(1)}}} \sum_{\substack{j_{n^{(1)}(r)}^{(1)}(r)=v_1, \dots, v_k \\ r=1, \dots, h_q^{(1)}}} \sum_{\substack{j_{n^{(2)}(rr)}^{(2)}(rr)=v_1, \dots, v_k \\ rr=1, \dots, h_q^{(2)}(l^{(1)}(\tau^{(2)}(r))), \\ r=1, \dots, w_q^{(2)}}}
\end{aligned}$$

$$\left\{ d^{h_p^{(1)}+h_q^{(1)}} f_x(I_t \left( \mathbf{vl}_p((l^{(1)}(1), \dots, l^{(1)}(h_p^{(1)})) | (i_{l^{(1)}(1)}^{(1)}(1), \dots, i_{l^{(1)}(h_p^{(1)})}^{(1)}(h_p^{(1)}))) | \mathbf{vl}_q((n^{(1)}(1), \dots, n^{(1)}(h_q^{(1)})) | (j_{n^{(1)}(1)}^{(1)}(1), \dots)) \right) \right\}$$

$$\left\{ \prod_{r=1}^{w_q^{(2)}} d^{h_q^{(2)}(l^{(1)}(\tau^{(2)}(r)))} f_{i_{l^{(1)}(\tau^{(2)}(r))}^{(1)}(\tau^{(2)}(r))} \left( \mathbf{0}_p | \mathbf{vl}_q((n^{(2)}(1), \dots, n^{(2)}(h_q^{(2)}(l^{(1)}(\tau^{(2)}(r)))) | (j_{n^{(2)}(1)}^{(2)}(1), \dots, j_{n^{(2)}(h_q^{(2)}(l^{(1)}(\tau^{(2)}(r)))}^{(2)}(h_q^{(2)}(\dots)))) \right) \right\}$$

$$(I_{t-l^{(1)}(\tau^{(2)}(r))})$$

$$\left( \prod_{r=1}^{h_q^{(1)}} f_{j_{n^{(1)}(r)}^{(1)}(r)}(I_{t-n^{(1)}(r)}) \right) \left( \prod_{r=1}^{w_q^{(2)}} \prod_{rr=1}^{h_q^{(2)}(l^{(1)}(\tau^{(2)}(r)))} f_{j_{n^{(2)}(rr)}^{(2)}(rr)}(I_{t-l^{(1)}(\tau^{(2)}(r))-n^{(2)}(rr)}) \right)$$

$$\prod_{\substack{r=1 \\ r \neq \tau^{(2)}(\rho), \\ \rho=1, \dots, w_q^{(2)}}}^{h_p^{(1)}} f_{i_{l^{(1)}(r)}^{(1)}(r)}(I_{t-l^{(1)}(r)}) +$$

$$\sum_{h_p^{(1)}=1}^p \sum_{h_q^{(1)}=0}^q \sum_{\substack{l^{(1)}(1), \dots, l^{(1)}(h_p^{(1)})=1 \\ l^{(1)}(1) < \dots < l^{(1)}(h_p^{(1)})}}^p \sum_{\substack{n^{(1)}(1), \dots, n^{(1)}(h_q^{(1)})=1 \\ n^{(1)}(1) < \dots < n^{(1)}(h_q^{(1)})}}^q$$

$$\sum_{w_p^{(2)}=1}^{h_p^{(1)}} \sum_{\substack{s^{(2)}(1), \dots, s^{(2)}(w_p^{(2)})=1 \\ s^{(2)}(1) < \dots < s^{(2)}(w_p^{(2)})}}^{h_p^{(1)}} \sum_{w_q^{(2)}=0}^{h_p^{(1)}-w_p^{(2)}} \sum_{\substack{\tau^{(2)}(1), \dots, \tau^{(2)}(w_q^{(2)})=1 \\ \tau^{(2)}(1) < \dots < \tau^{(2)}(w_q^{(2)}), \\ \tau^{(2)}(r_1) \neq s^{(2)}(r_2), \\ r_1=1, \dots, w_q^{(2)}, \\ r_2=1, \dots, w_p^{(2)}}}^{h_p^{(1)}}$$

$$\sum_{r=1, \dots, w_p^{(2)}}^p \sum_{r=1, \dots, w_p^{(2)}}^q \sum_{r=1, \dots, w_q^{(2)}}^q$$

$$h_p^{(2)}(l^{(1)}(s^{(2)}(r)))=1 \quad h_q^{(2)}(l^{(1)}(s^{(2)}(r)))=0 \quad h_q^{(2),1}(l^{(1)}(\tau^{(2)}(r)))=1$$

$$\sum_{r=1, \dots, w_p^{(2)}}^p \sum_{r=1, \dots, w_p^{(2)}}^q$$

$$l^{(2)}(1), \dots, l^{(2)}(h_p^{(2)}(l^{(1)}(s^{(2)}(r))))=1 \quad n^{(2)}(1), \dots, n^{(2)}(h_q^{(2)}(l^{(1)}(s^{(2)}(r))))=1$$

$$l^{(2)}(1) < \dots < l^{(2)}(h_p^{(2)}(l^{(1)}(s^{(2)}(r)))) \quad n^{(2)}(1) < \dots < n^{(2)}(h_q^{(2)}(l^{(1)}(s^{(2)}(r))))$$

$$\sum_{r=1, \dots, w_q^{(2)}}^q$$

$$n^{(2),1}(1), \dots, n^{(2),1}(h_q^{(2),1}(l^{(1)}(\tau^{(2)}(r))))=1$$

$$n^{(2),1}(1) < \dots < n^{(2),1}(h_q^{(2),1}(l^{(1)}(\tau^{(2)}(r))))$$

$$\sum_{\substack{i_{l^{(1)}(r)}^{(1)}(r) = v_1, \dots, v_k \\ r = 1, \dots, h_p^{(1)}}} \quad \sum_{\substack{j_{n^{(1)}(r)}^{(1)}(r) = v_1, \dots, v_k \\ r = 1, \dots, h_q^{(1)}}}$$

$$\sum_{\substack{i_{l^{(2)}(rr)}^{(2)}(rr) = v_1, \dots, v_k \\ rr = 1, \dots, h_p^{(2)}(l^{(1)}(s^{(2)}(r))), \\ r = 1, \dots, w_p^{(2)}}}$$

$$\sum_{\substack{j_{n^{(2)}(rr)}^{(2)}(rr) = v_1, \dots, v_k \\ rr = 1, \dots, h_q^{(2)}(l^{(1)}(s^{(2)}(r))), \\ r = 1, \dots, w_p^{(2)}}} \quad \sum_{\substack{j_{n^{(2),1}(rr)}^{(2),1}(rr) = v_1, \dots, v_k \\ rr = 1, \dots, h_q^{(2),1}(l^{(1)}(\tau^{(2)}(r))), \\ r = 1, \dots, w_q^{(2)}}}$$

$$\left\{ d^{h_p^{(1)}+h_q^{(1)}} f_x(I_t^{(\mathbf{vl}_p((l^{(1)}(1), \dots, l^{(1)}(h_p^{(1)})) | (i_{l^{(1)}(1)}^{(1)}(1), \dots, i_{l^{(1)}(h_p^{(1)})}^{(1)}(h_p^{(1)}))) | \mathbf{vl}_q((n^{(1)}(1), \dots, n^{(1)}(h_q^{(1)})) | (j_{n^{(1)}(1)}^{(1)}(1), \dots)))))) \right\}$$

$$\left\{ \prod_{r=1}^{w_p^{(2)}} d^{h_p^{(2)}(l^{(1)}(s^{(2)}(r))) + h_q^{(2)}(l^{(1)}(s^{(2)}(r)))} f_{i_{l^{(1)}(s^{(2)}(r))}^{(1)}(s^{(2)}(r))} \right.$$

$$\left. (I_{t-l^{(1)}(s^{(2)}(r))}^{(\mathbf{vl}_p((l^{(2)}(1), \dots, l^{(2)}(h_p^{(2)}(l^{(1)}(s^{(2)}(r)))) | (i_{l^{(2)}(1)}^{(2)}(1), \dots)) | \mathbf{vl}_q((n^{(2)}(1), \dots, n^{(2)}(h_q^{(2)}(l^{(1)}(s^{(2)}(r)))) |)))} \right\}$$

$$\left\{ \prod_{r=1}^{w_q^{(2)}} d^{h_q^{(2),1}(l^{(1)}(\tau^{(2)}(r)))} f_{i_{l^{(1)}(\tau^{(2)}(r))}^{(1)}(\tau^{(2)}(r))} \right.$$

$$\left. (I_{t-l^{(1)}(\tau^{(2)}(r))}^{(\mathbf{0}_p | \mathbf{vl}_q((n^{(2),1}(1), \dots, n^{(2),1}(h_q^{(2),1}(l^{(1)}(\tau^{(2)}(r)))) | (j_{n^{(2),1}(1)}^{(2),1}(1), \dots, j_{n^{(2),1}(h_q^{(2),1}(l^{(1)}(\tau^{(2)}(r)))}^{(2),1}(h_q^{(2),1}(\dots))))))} \right\}$$

$$\left( \prod_{r=1}^{h_q^{(1)}} f_{j_{n^{(1)}(r)}^{(1)}(r)}(I_{t-n^{(1)}(r)}) \right) \prod_{\substack{r=1 \\ r \neq s^{(2)}(\rho_1), \tau^{(2)}(\rho_2), \\ \rho_1 = 1, \dots, w_p^{(2)}, \\ \rho_2 = 1, \dots, w_q^{(2)}}}^{h_p^{(1)}} f_{i_{l^{(1)}(r)}^{(1)}(r)}(I_{t-l^{(1)}(r)})$$

$$\left( \prod_{r=1}^{w_p^{(2)}} \prod_{rr=1}^{h_q^{(2)}(l^{(1)}(s^{(2)}(r)))} f_{j_{n^{(2)}(rr)}^{(2)}(rr)}(I_{t-l^{(1)}(s^{(2)}(r))-n^{(2)}(rr)}) \right)$$

$$\left( \prod_{r=1}^{w_q^{(2)}} \prod_{rr=1}^{h_q^{(2),1}(l^{(1)}(\tau^{(2)}(r)))} f_{j_{n^{(2),1}(rr)}^{(2),1}(rr)}(I_{t-l^{(1)}(\tau^{(2)}(r))-n^{(2),1}(rr)}) \right)$$

$$\left( \prod_{r=1}^{w_p^{(2)}} \prod_{rr=1}^{h_p^{(2)}(l^{(1)}(s^{(2)}(r)))} f_{i_{l^{(2)}(rr)}^{(2)}}(I_{t-l^{(1)}(s^{(2)}(r))-l^{(2)}(rr)}) \right) + \dots$$

and it keeps going in a way that should be obvious by now.
